# Supplementary material
Source: publisher figshare collection journal article supplement (https://rs.figshare.com/ndownloader/files/31315264)
Supplement: Supplementary file 1 [file 31315264]

species	zoonotic_capacity_score	above_50	top_10_percent	bootstraps_above_50	mean_zoonotic_capacity_score	sd_zoonotic_capacity_score
Macaca fascicularis	0.987690014	1	1	50	0.965367776	0.01975132
Macaca nemestrina	0.984475158	1	1	50	0.962301334	0.02027161
Hylobates moloch	0.982185175	1	1	50	0.949201563	0.025004066
Presbytis comata	0.974698013	1	1	50	0.932209929	0.031553357
Hylobates klossii	0.973776035	1	1	50	0.936241422	0.028853182
Macaca pagensis	0.972154224	1	1	50	0.934487072	0.02833674
Hylobates pileatus	0.971842087	1	1	50	0.938117442	0.029451083
Cebus capucinus	0.971521214	1	1	50	0.947747388	0.02352679
Nasalis larvatus	0.971330376	1	1	50	0.938105743	0.028644392
Symphalangus syndactylus	0.971329061	1	1	50	0.937622418	0.028199183
Hylobates agilis	0.97004594	1	1	50	0.935518136	0.028522817
Presbytis rubicunda	0.968171309	1	1	50	0.929703123	0.032475867
Trachypithecus cristatus	0.967354444	1	1	50	0.931359808	0.029104323
Presbytis melalophos	0.967228827	1	1	50	0.931493903	0.030523599
Simias concolor	0.966867216	1	1	50	0.928046005	0.030903177
Trachypithecus obscurus	0.966816485	1	1	50	0.934571842	0.029262893
Macaca silenus	0.96522215	1	1	50	0.928372695	0.028159449
Mandrillus leucophaeus	0.965146399	1	1	50	0.938078091	0.024161896
Hylobates muelleri	0.964170969	1	1	50	0.929552779	0.030702152
Presbytis potenziani	0.963374809	1	1	50	0.921684237	0.030977133
Semnopithecus entellus	0.962679039	1	1	50	0.918165872	0.031240532
Presbytis natunae	0.962534686	1	1	50	0.916496195	0.032105156
Macaca sinica	0.962509756	1	1	50	0.930866845	0.027470778
Macaca mulatta	0.96225654	1	1	50	0.929398684	0.031149904
Tarsius pelengensis	0.962042807	1	1	50	0.878834871	0.052360539
Pongo pygmaeus	0.960976637	1	1	50	0.919052341	0.036344586
Pteropus vampyrus	0.960455607	1	1	50	0.912742134	0.045223721
Tarsius syrichta	0.960362984	1	1	50	0.894655465	0.049949557
Trachypithecus germaini	0.960031472	1	1	50	0.924356716	0.029742788
Ursus arctos	0.959768587	1	1	50	0.891881804	0.058492827
Hylobates albibarbis	0.959378996	1	1	50	0.914307886	0.033229704
Pygathrix nigripes	0.959295911	1	1	50	0.921030268	0.031753621
Macaca maura	0.959068263	1	1	50	0.906607849	0.036305187
Pan paniscus	0.959031299	1	1	50	0.929763252	0.028227092
Semnopithecus hypoleucos	0.958797754	1	1	50	0.911527309	0.032758822
Gazella gazella	0.95874427	1	1	50	0.866462462	0.046517864
Macaca radiata	0.958659264	1	1	50	0.92336118	0.028508525
Cercocebus atys	0.957513691	1	1	50	0.92753874	0.028438697
Hydropotes inermis	0.957382055	1	1	50	0.863385303	0.058389867
Nomascus gabriellae	0.956762371	1	1	50	0.905333176	0.034872325
Presbytis femoralis	0.956724101	1	1	50	0.92094975	0.030579632
Ateles geoffroyi	0.956175732	1	1	50	0.92784484	0.028463652
Macaca siberu	0.955615343	1	1	50	0.907942648	0.037873798
Rhinopithecus roxellana	0.953727908	1	1	50	0.892187999	0.044605943
Rusa marianna	0.953629996	1	1	50	0.887303338	0.047855601
Macaca ochreata	0.953571738	1	1	50	0.91097093	0.033605099
Chlorocebus sabaeus	0.95332967	1	1	50	0.92193135	0.026898213
Piliocolobus preussi	0.95239812	1	1	50	0.916459817	0.030211059
Cervus nippon	0.952346285	1	1	50	0.870397983	0.053851365
Helarctos malayanus	0.951735347	1	1	50	0.907330547	0.044675499
Tarsius bancanus	0.951306585	1	1	50	0.888175402	0.051086212
Saimiri oerstedii	0.949763847	1	1	50	0.910769612	0.033504675
Nomascus hainanus	0.949585145	1	1	50	0.864055819	0.059363229
Papio anubis	0.949479724	1	1	50	0.923763762	0.029305621
Panthera tigris	0.949125972	1	1	50	0.890840787	0.047531232
Presbytis chrysomelas	0.94884563	1	1	50	0.903660168	0.034189431
Macaca nigra	0.948562609	1	1	50	0.896094554	0.038773863
Semnopithecus priam	0.948410565	1	1	50	0.906587739	0.033259112
Trachypithecus johnii	0.948244398	1	1	50	0.906253899	0.032816554
Presbytis siamensis	0.947270416	1	1	50	0.905926901	0.033546361
Papio papio	0.947265923	1	1	50	0.911780639	0.028649635
Propithecus coquereli	0.947219084	1	1	50	0.909051601	0.031064004
Trachypithecus auratus	0.94706517	1	1	50	0.886863933	0.04334041
Cercopithecus sclateri	0.946969096	1	1	50	0.9075605	0.030142876
Axis axis	0.946952251	1	1	50	0.885739521	0.042367446
Hylobates lar	0.946878821	1	1	50	0.912010479	0.035158501
Ursus thibetanus	0.946322317	1	1	50	0.875810692	0.05085268
Nomascus leucogenys	0.945812653	1	1	50	0.896337203	0.037183827
Bos javanicus	0.945632265	1	1	50	0.892057529	0.047783949
Chlorocebus aethiops	0.945376407	1	1	50	0.917032171	0.028557643
Cebus olivaceus	0.945355928	1	1	50	0.911326249	0.035216984
Alouatta seniculus	0.944507828	1	1	50	0.907745591	0.034970483
Colobus polykomos	0.944361022	1	1	50	0.911305676	0.031163824
Piliocolobus badius	0.943868069	1	1	50	0.908058364	0.035792462
Bubalus mindorensis	0.943832193	1	1	50	0.877642339	0.04824828
Semnopithecus dussumieri	0.943770501	1	1	50	0.897855908	0.034994756
Rusa alfredi	0.943673829	1	1	50	0.861952036	0.049050793
Rusa timorensis	0.94314464	1	1	50	0.857465184	0.054795723
Capricornis sumatraensis	0.942785575	1	1	50	0.88982838	0.045434129
Lutra sumatrana	0.941914261	1	1	50	0.872980068	0.050567782
Viverra megaspila	0.941847095	1	1	50	0.881942048	0.049746272
Rhinopithecus brelichi	0.941541972	1	1	50	0.864747816	0.048147006
Presbytis thomasi	0.941257974	1	1	50	0.90929481	0.032318095
Cebus apella	0.941125122	1	1	50	0.9058231	0.036624816
Ateles fusciceps	0.940695548	1	1	50	0.911199476	0.032199687
Alouatta pigra	0.94040707	1	1	50	0.906659995	0.033463295
Manis javanica	0.939597426	1	1	50	0.883678105	0.050419218
Presbytis frontata	0.939578309	1	1	50	0.888842517	0.040704674
Piliocolobus kirkii	0.939134266	1	1	50	0.889353637	0.036799495
Macaca hecki	0.938950837	1	1	50	0.889591865	0.037761646
Pongo abelii	0.938681965	1	1	50	0.900135931	0.036011469
Trachypithecus hatinhensis	0.938165853	1	1	50	0.871841782	0.042072248
Cercopithecus erythrogaster	0.938088476	1	1	50	0.903302803	0.031455645
Cercopithecus diana	0.937696523	1	1	50	0.908278488	0.035856593
Phloeomys cumingi	0.937401608	1	1	50	0.864511289	0.05408846
Macaca tonkeana	0.937246797	1	1	50	0.889988895	0.039235925
Saimiri sciureus	0.937037428	1	1	50	0.89646851	0.038059135
Mandrillus sphinx	0.936586086	1	1	50	0.90646558	0.033984101
Macaca cyclopis	0.936278406	1	1	50	0.858095293	0.047508239
Trachypithecus francoisi	0.936265745	1	1	50	0.868632365	0.049091141
Trachypithecus delacouri	0.936263504	1	1	50	0.86713576	0.04548492
Pygathrix cinerea	0.936158937	1	1	50	0.886929662	0.037351226
Rucervus eldii	0.935899277	1	1	50	0.87697412	0.047716253
Colobus vellerosus	0.935398452	1	1	50	0.903576815	0.029394277
Rhinoceros sondaicus	0.934364983	1	1	50	0.857531543	0.055952633
Cercopithecus erythrotis	0.933551362	1	1	50	0.904846848	0.032638332
Tarsius pumilus	0.933512239	1	1	50	0.831054719	0.062205202
Tapirus indicus	0.933285586	1	1	50	0.880440055	0.051174225
Trachypithecus poliocephalus	0.933258886	1	1	50	0.856969765	0.044347847
Cercocebus galeritus	0.932868684	1	1	50	0.879992973	0.038863929
Nomascus siki	0.932588248	1	1	50	0.882054838	0.038530879
Rucervus duvaucelii	0.932093135	1	1	50	0.859968832	0.045627662
Dobsonia moluccensis	0.931799408	1	1	50	0.858818452	0.059047045
Mydaus marchei	0.931092327	1	1	50	0.854400922	0.052987063
Rhinoceros unicornis	0.930929696	1	1	50	0.871601655	0.051588243
Pygathrix nemaeus	0.93068671	1	1	50	0.891953705	0.038621472
Alouatta coibensis	0.930533458	1	1	50	0.885213046	0.036864378
Macaca fuscata	0.929879073	1	1	50	0.862180438	0.050075873
Sus cebifrons	0.929635951	1	1	50	0.866670937	0.046736131
Macaca nigrescens	0.929625203	1	1	50	0.870685608	0.040210094
Nomascus concolor	0.929051843	1	1	50	0.864761292	0.046462015
Pan troglodytes	0.928931216	1	1	50	0.888783874	0.043192877
Cercopithecus pogonias	0.928856676	1	1	50	0.890478301	0.034226524
Procolobus verus	0.928028951	1	1	50	0.899246893	0.034575273
Macaca leonina	0.927935602	1	1	50	0.890147834	0.038354523
Aotus lemurinus	0.927283493	1	1	50	0.888195435	0.041541473
Indri indri	0.927236931	1	1	50	0.886013874	0.038625133
Theropithecus gelada	0.926504951	1	1	50	0.892789957	0.033189025
Ateles belzebuth	0.926243355	1	1	50	0.883541787	0.040637476
Piliocolobus rufomitratus	0.926006353	1	1	50	0.871199904	0.037443985
Macaca thibetana	0.925961424	1	1	50	0.85987754	0.046836094
Cynocephalus volans	0.925196714	1	1	50	0.855494021	0.061501514
Dicerorhinus sumatrensis	0.925032502	1	1	50	0.864678452	0.056620149
Lagothrix lagothricha	0.924721845	1	1	50	0.884201632	0.041713924
Presbytis hosei	0.924685306	1	1	50	0.883269445	0.041032355
Cebus albifrons	0.924568812	1	1	50	0.888646682	0.038205664
Cercopithecus preussi	0.924384086	1	1	50	0.896398095	0.035965587
Ateles paniscus	0.924213144	1	1	50	0.882992786	0.042013509
Propithecus tattersalli	0.924188889	1	1	50	0.870656289	0.040770851
Propithecus diadema	0.924181117	1	1	50	0.881435255	0.041495868
Cercopithecus lowei	0.923850858	1	1	50	0.894973008	0.030984415
Propithecus perrieri	0.923351078	1	1	50	0.869731384	0.037747984
Aotus trivirgatus	0.923203163	1	1	50	0.866695315	0.04986504
Trachypithecus ebenus	0.923019894	1	1	50	0.880190677	0.038664017
Hystrix javanica	0.922761195	1	1	50	0.849408716	0.056112623
Axis calamianensis	0.922705608	1	1	50	0.845454321	0.048413965
Axis kuhlii	0.922409424	1	1	50	0.827978842	0.060330837
Macaca arctoides	0.922375522	1	1	50	0.883095205	0.041562842
Tarsius sangirensis	0.922259726	1	1	50	0.815281938	0.072637138
Cercopithecus cephus	0.921259035	1	1	50	0.893214401	0.035449809
Cercocebus torquatus	0.920895653	1	1	50	0.887384524	0.036337901
Manis culionensis	0.920785743	1	1	50	0.852789794	0.053299104
Rhinopithecus avunculus	0.920779937	1	1	50	0.845287592	0.047154961
Trachypithecus vetulus	0.920669746	1	1	50	0.879625022	0.037680158
Cebus kaapori	0.920566679	1	1	50	0.882982292	0.038113586
Hystrix pumila	0.920437107	1	1	50	0.84960946	0.055817022
Sus philippensis	0.920245298	1	1	50	0.866795726	0.04587548
Eulemur mongoz	0.919891625	1	1	50	0.858709557	0.042953849
Sus ahoenobarbus	0.919827314	1	1	50	0.852431519	0.047575505
Nycticebus coucang	0.919780973	1	1	50	0.859913127	0.051330538
Harpyionycteris whiteheadi	0.919733258	1	1	50	0.830858799	0.0684988
Sus verrucosus	0.91929472	1	1	50	0.844389061	0.052638228
Cercopithecus mona	0.918706795	1	1	50	0.887518642	0.033475314
Piliocolobus pennantii	0.918491397	1	1	50	0.866079624	0.038609559
Cercopithecus nictitans	0.918381579	1	1	50	0.890495167	0.035723593
Ptenochirus jagori	0.918222756	1	1	50	0.825564711	0.073327265
Viverra civettina	0.917914843	1	1	50	0.855314133	0.055970628
Piliocolobus tephrosceles	0.917444173	1	1	50	0.874679645	0.038673199
Dobsonia pannietensis	0.917197552	1	1	50	0.83841172	0.066223751
Viverra tangalunga	0.916892594	1	1	50	0.861706948	0.055823334
Muntiacus muntjak	0.91686432	1	1	50	0.863240425	0.053725655
Muntiacus reevesi	0.916394579	1	1	50	0.817501947	0.064430125
Ateles chamek	0.91601256	1	1	50	0.876121	0.041772251
Acerodon jubatus	0.915244134	1	1	50	0.837833601	0.061608969
Hexaprotodon liberiensis	0.915156746	1	1	50	0.87017804	0.047700673
Nyctimene rabori	0.914768702	1	1	50	0.815028801	0.066046121
Nyctereutes procyonoides	0.91464618	1	1	50	0.828114148	0.08447211
Lophocebus aterrimus	0.914608083	1	1	50	0.880294477	0.03516083
Ailuropoda melanoleuca	0.914405794	1	1	50	0.81536088	0.058709564
Gorilla gorilla	0.914212553	1	1	50	0.860291241	0.049860882
Meriones unguiculatus	0.914159349	1	1	50	0.793746078	0.096230496
Cercopithecus dryas	0.914075946	1	1	50	0.863669966	0.038634651
Hydromys neobritannicus	0.913240117	1	1	50	0.827109317	0.066619397
Cynogale bennettii	0.913108681	1	1	50	0.854215704	0.061735544
Trachypithecus phayrei	0.912586801	1	1	50	0.869653893	0.03845109
Cynopterus horsfieldii	0.91241571	1	1	50	0.813836589	0.077145093
Saimiri boliviensis	0.912356609	1	1	50	0.868621992	0.047955144
Chiropotes albinasus	0.911345888	1	1	50	0.874639367	0.040855036
Nycticebus pygmaeus	0.910861068	1	1	50	0.843254233	0.046853346
Tragulus nigricans	0.910336002	1	1	50	0.845132098	0.049205571
Pseudoryx nghetinhensis	0.909632838	1	1	50	0.825827391	0.056931873
Bubalus bubalis	0.90942948	1	1	50	0.844553593	0.055047422
Cercopithecus roloway	0.909370643	1	1	50	0.874937379	0.035327929
Dorcopsis atrata	0.909277258	1	1	50	0.821964698	0.067081341
Trachypithecus laotum	0.909117958	1	1	50	0.845098081	0.046042567
Bos sauveli	0.908420991	1	1	50	0.852495851	0.057034889
Ailurus fulgens	0.908115575	1	1	50	0.843782029	0.052027853
Muntiacus atherodes	0.90650261	1	1	50	0.843053767	0.056029582
Saguinus geoffroyi	0.90628383	1	1	50	0.865803491	0.042320575
Herpestes javanicus	0.905918887	1	1	50	0.814103111	0.074618849
Melogale everetti	0.905865027	1	1	50	0.816374867	0.072293229
Muntiacus feae	0.905838178	1	1	50	0.85958441	0.052449875
Ateles hybridus	0.905418566	1	1	50	0.872490732	0.037989196
Madoqua guentheri	0.905098273	1	1	50	0.837482309	0.053798899
Cercopithecus campbelli	0.904550632	1	1	50	0.875281675	0.043217753
Phalanger rothschildi	0.904322711	1	1	50	0.827534484	0.073116199
Colobus satanas	0.904032616	1	1	50	0.870410592	0.03658657
Nanger dama	0.903856806	1	1	50	0.806003635	0.054906869
Nesolagus netscheri	0.90365397	1	1	50	0.823711465	0.065353461
Aotus nancymaae	0.903507958	1	1	50	0.844367798	0.067403248
Crateromys paulus	0.903444022	1	1	50	0.811317913	0.065933389
Tarsius dentatus	0.902946827	1	1	50	0.798092996	0.072314954
Podogymnura truei	0.902435245	1	1	50	0.827384847	0.062100027
Capricornis crispus	0.902308821	1	1	50	0.787899347	0.075108103
Madoqua saltiana	0.902219412	1	1	50	0.821334761	0.057087773
Saguinus oedipus	0.901839249	1	1	50	0.865158135	0.040769992
Melursus ursinus	0.901818518	1	1	50	0.843633704	0.050436419
Prolemur simus	0.901792216	1	1	50	0.846158013	0.045445076
Eulemur sanfordi	0.900973121	1	1	50	0.84211081	0.041658246
Erythrocebus patas	0.900893141	1	1	50	0.867088095	0.036829305
Eulemur cinereiceps	0.900641883	1	1	50	0.830938407	0.047320158
Cercocebus chrysogaster	0.900274582	1	1	50	0.864303509	0.040750468
Callicebus coimbrai	0.89973653	1	1	50	0.842230543	0.050008819
Madoqua piacentinii	0.899414891	1	1	50	0.816100283	0.055150986
Galago senegalensis	0.899362008	1	1	50	0.829380962	0.058723546
Acerodon mackloti	0.898973601	1	1	50	0.821087693	0.069327044
Crateromys schadenbergi	0.898841501	1	1	50	0.810185006	0.069483766
Pteropus leucopterus	0.898760918	1	1	50	0.795156177	0.076267126
Lophocebus albigena	0.898706494	1	1	50	0.868604618	0.038360352
Sus bucculentus	0.898240382	1	1	50	0.808423582	0.055798487
Tragulus napu	0.89798539	1	1	50	0.849355584	0.052025651
Pteromyscus pulverulentus	0.897713881	1	1	50	0.81460128	0.069672511
Cercopithecus petaurista	0.89762217	1	1	50	0.8716628	0.038741043
Muntiacus crinifrons	0.89759893	1	1	50	0.797271373	0.067731832
Gazella dorcas	0.897507895	1	1	50	0.826263326	0.055409141
Aotus nigriceps	0.896490236	1	1	50	0.829719136	0.061074079
Cacajao calvus	0.896408806	1	1	50	0.852458094	0.05002849
Melogale orientalis	0.896263064	1	1	50	0.800056704	0.073130169
Papio hamadryas	0.89589338	1	1	50	0.879987126	0.03648656
Hemitragus hylocrius	0.895890106	1	1	50	0.829532119	0.055837033
Pteropus cognatus	0.895824626	1	1	50	0.808693253	0.065180839
Brachyteles arachnoides	0.895747387	1	1	50	0.848230131	0.046889343
Boselaphus tragocamelus	0.894279596	1	1	50	0.821364496	0.054511848
Piliocolobus tholloni	0.893100568	1	1	50	0.852834071	0.042942192
Tetracerus quadricornis	0.893027528	1	1	50	0.819663547	0.050435636
Varecia variegata	0.892514065	1	1	50	0.845267298	0.041860621
Pithecia pithecia	0.892202735	1	1	50	0.844039361	0.051637457
Crocuta crocuta	0.891537481	1	1	50	0.803452221	0.082496231
Trachypithecus pileatus	0.891360018	1	1	50	0.845637313	0.050723745
Ateles marginatus	0.89125406	1	1	50	0.851690903	0.045927034
Phaner electromontis	0.890041701	1	1	50	0.834576921	0.043194535
Muntiacus truongsonensis	0.889725425	1	1	50	0.817439481	0.058226554
Rhinolophus rufus	0.889719753	1	1	50	0.770216986	0.080920948
Lontra canadensis	0.889575908	1	1	50	0.757691271	0.08202236
Tayassu pecari	0.888942192	1	1	50	0.819268255	0.061501779
Trachypithecus geei	0.888817654	1	1	50	0.821089967	0.054810387
Dobsonia anderseni	0.888796959	1	1	50	0.818787821	0.063171034
Mustela nudipes	0.888715024	1	1	50	0.801218523	0.075585532
Hystrix crassispinis	0.888349601	1	1	50	0.822796291	0.063887724
Lophocebus opdenboschi	0.888187328	1	1	50	0.855379289	0.037655112
Hystrix sumatrae	0.887767863	1	1	50	0.832761962	0.059794875
Cercopithecus neglectus	0.887540981	1	1	50	0.862825276	0.038050443
Galago alleni	0.8874406	1	1	50	0.838674911	0.049759832
Galago cameronensis	0.886399253	1	1	50	0.824882293	0.057782259
Chrotomys mindorensis	0.886317103	1	1	50	0.78131927	0.080713535
Cercopithecus ascanius	0.885331539	1	1	50	0.860883704	0.037490086
Cercopithecus wolfi	0.885280439	1	1	50	0.853661167	0.036859712
Pithecia monachus	0.885279511	1	1	50	0.841433554	0.051361379
Saguinus nigricollis	0.884435819	1	1	50	0.810505834	0.062238538
Semnopithecus ajax	0.884321536	1	1	50	0.810871966	0.05769058
Hylopetes nigripes	0.883532424	1	1	50	0.809295546	0.069317689
Gazella bennettii	0.882635188	1	1	50	0.807155281	0.050701561
Hapalemur aureus	0.882514245	1	1	50	0.832430666	0.045487266
Pteropus pumilus	0.882425961	1	1	50	0.7739917	0.089660046
Dobsonia peronii	0.881938473	1	1	50	0.803824531	0.070040737
Cercocebus sanjei	0.880272167	1	1	50	0.813311587	0.045196789
Vulpes vulpes	0.880204933	1	1	50	0.801258522	0.09097594
Loris lydekkerianus	0.880081413	1	1	50	0.819588186	0.054069494
Odocoileus virginianus	0.880047957	1	1	50	0.806248031	0.078011635
Papio cynocephalus	0.879733743	1	1	50	0.853872503	0.041123063
Xenuromys barbatus	0.879728595	1	1	50	0.781223993	0.088807517
Pteropus intermedius	0.879199812	1	1	50	0.82073802	0.062240108
Muntiacus puhoatensis	0.878887151	1	1	50	0.769563259	0.062216103
Trachypithecus barbei	0.878782575	1	1	50	0.83155575	0.044441237
Rattus pelurus	0.878236234	1	1	50	0.780747975	0.072310083
Nycticebus bengalensis	0.878171101	1	1	50	0.838602153	0.043527357
Capricornis swinhoei	0.877374743	1	1	50	0.769043792	0.068077927
Alouatta macconnelli	0.876750699	1	1	50	0.825715599	0.051490828
Loris tardigradus	0.876560231	1	1	50	0.785556542	0.075645418
Pteropus melanotus	0.876549799	1	1	50	0.795577989	0.056375789
Phalanger lullulae	0.876533191	1	1	50	0.785455342	0.087123887
Hipposideros lekaguli	0.876521474	1	1	50	0.756674893	0.084498244
Kerodon rupestris	0.876425694	1	1	50	0.782995922	0.073846332
Mustela lutreolina	0.87639007	1	1	50	0.788851258	0.076315633
Saguinus graellsi	0.875745049	1	1	50	0.80748584	0.057866061
Rattus koopmani	0.875550757	1	1	50	0.778617641	0.071841168
Canis lupus	0.875396022	1	1	50	0.777430909	0.082379073
Mustela erminea	0.875393371	1	1	48	0.767278826	0.106052687
Cynopterus titthaecheilus	0.87539248	1	1	50	0.773914959	0.081426708
Procapra przewalskii	0.875361298	1	1	50	0.745788996	0.06892578
Saguinus labiatus	0.875158015	1	1	50	0.81639497	0.056754817
Dobsonia praedatrix	0.874311963	1	1	50	0.782521541	0.078984376
Alouatta belzebul	0.874179871	1	1	50	0.834716916	0.043623693
Propithecus deckenii	0.874041266	1	1	50	0.820849367	0.046102346
Dorcopsis hageni	0.873996055	1	1	50	0.811814453	0.066102283
Lepilemur ankaranensis	0.873858282	1	1	50	0.809659745	0.049536386
Callosciurus melanogaster	0.873695935	1	1	50	0.799111776	0.072772965
Hylopetes bartelsi	0.873030027	1	1	50	0.767674649	0.075526483
Oryzomys dimidiatus	0.87301548	1	1	50	0.757718423	0.076156405
Dendrolagus scottae	0.872766907	1	1	50	0.803940618	0.075553615
Hylopetes spadiceus	0.872624221	1	1	50	0.809872876	0.06902764
Pithecia irrorata	0.872555925	1	1	50	0.82354208	0.050870634
Daubentonia madagascariensis	0.872378006	1	1	50	0.839731274	0.049747619
Saguinus mystax	0.872210939	1	1	50	0.820464849	0.061556519
Bubalus quarlesi	0.872007311	1	1	50	0.80862729	0.062391067
Phodopus campbelli	0.872002327	1	1	45	0.721669533	0.137476168
Cynopterus brachyotis	0.871594164	1	1	50	0.773048588	0.087718292
Tupaia glis	0.870913373	1	1	50	0.792974623	0.078999894
Muntiacus vuquangensis	0.870851727	1	1	50	0.80677882	0.059371112
Phalanger ornatus	0.870693767	1	1	50	0.786254941	0.087384824
Acerodon leucotis	0.870670531	1	1	50	0.774731296	0.070999433
Aotus vociferans	0.870612308	1	1	50	0.824529365	0.05654935
Neotragus pygmaeus	0.870576743	1	1	50	0.820338393	0.054501038
Elaphodus cephalophus	0.870062356	1	1	50	0.758193078	0.070884117
Rhinopithecus bieti	0.869861239	1	1	50	0.799120838	0.05788036
Saguinus fuscicollis	0.869831496	1	1	50	0.815556551	0.056231421
Cephalophus adersi	0.869558863	1	1	50	0.804536499	0.057756351
Bubalus depressicornis	0.869370586	1	1	50	0.800862722	0.063057962
Saguinus bicolor	0.869210443	1	1	50	0.811190407	0.054951422
Bassaricyon pauli	0.869155325	1	1	50	0.794504061	0.070595126
Eulemur rubriventer	0.868443394	1	1	50	0.838293932	0.043437744
Lagothrix poeppigii	0.868381212	1	1	50	0.813294782	0.053928348
Leontopithecus chrysomelas	0.868098747	1	1	50	0.802341366	0.051742092
Saimiri vanzolinii	0.867541872	1	1	50	0.807209811	0.058088233
Rhinosciurus laticaudatus	0.867520468	1	1	50	0.798156667	0.078426415
Pteropus rayneri	0.867365256	1	1	50	0.788709322	0.069429851
Saguinus imperator	0.867176008	1	1	50	0.811224109	0.05810873
Sus barbatus	0.867127285	1	1	50	0.83717231	0.049818292
Bullimus bagobus	0.866777551	1	1	50	0.802999756	0.069478466
Apomys microdon	0.866157625	1	1	50	0.773356094	0.082715422
Hapalemur occidentalis	0.865909806	1	1	50	0.821431868	0.049405695
Aeromys tephromelas	0.865476588	1	1	50	0.815581127	0.06471364
Plagiodontia aedium	0.865421987	1	1	50	0.787348124	0.067309198
Avahi occidentalis	0.865110179	1	1	50	0.804460529	0.059037348
Okapia johnstoni	0.865103932	1	1	50	0.814752192	0.065065501
Macaca sylvanus	0.86487299	1	1	50	0.824067229	0.047448591
Tryphomys adustus	0.864690694	1	1	50	0.77938915	0.073039401
Callithrix humeralifera	0.864614366	1	1	50	0.810037901	0.065233638
Mustela putorius	0.864205732	1	1	45	0.726195242	0.131413065
Uromys imperator	0.863925935	1	1	50	0.771133375	0.074986377
Pteropus alecto	0.863540214	1	1	49	0.760605016	0.112259764
Dactylopsila tatei	0.863121341	1	1	50	0.776162223	0.081633926
Cercopithecus mitis	0.862968068	1	1	50	0.864243704	0.034118131
Solomys ponceleti	0.862937632	1	1	50	0.792602631	0.073802177
Lagothrix cana	0.862595071	1	1	50	0.815532254	0.053367209
Macrogalidia musschenbroekii	0.862051483	1	1	50	0.79313531	0.066147906
Strigocuscus pelengensis	0.861725832	1	1	50	0.787196211	0.081722072
Melomys aerosus	0.861546019	1	1	50	0.743567175	0.084147792
Pteropus keyensis	0.861448926	1	1	50	0.781561125	0.071648807
Alouatta palliata	0.861268176	1	1	50	0.841060562	0.049853445
Callicebus cupreus	0.861176743	1	1	50	0.79587884	0.067317988
Herpestes edwardsi	0.860113899	1	1	50	0.786493032	0.08050214
Pteralopex anceps	0.859709296	1	1	50	0.777243151	0.070251197
Mesocricetus auratus	0.859472018	1	1	49	0.766736843	0.104919108
Gorilla beringei	0.859454373	1	1	50	0.822236603	0.043432227
Pithecia albicans	0.859205819	1	1	50	0.810992475	0.057700892
Martes gwatkinsii	0.859196019	1	1	50	0.803585026	0.074940564
Semnopithecus hector	0.858574394	1	1	50	0.815851175	0.056420538
Otolemur garnettii	0.85848027	1	1	50	0.780612968	0.102693622
Mazama temama	0.858445555	1	1	50	0.809916948	0.050960739
Propithecus edwardsi	0.858374694	1	1	50	0.803447542	0.048176625
Varecia rubra	0.858072607	1	1	50	0.802880605	0.048982129
Herpestes smithii	0.857774513	1	1	50	0.806592851	0.077657581
Microcebus tavaratra	0.857753933	1	1	50	0.784392841	0.058236824
Melonycteris woodfordi	0.85749179	1	1	50	0.757518031	0.076694931
Panthera onca	0.85677343	1	1	50	0.791350237	0.062768282
Dendrolagus pulcherrimus	0.85667442	1	1	50	0.786945345	0.073305699
Herpestes brachyurus	0.85625866	1	1	50	0.795119421	0.074831079
Dasyprocta leporina	0.855946941	1	1	50	0.790983311	0.061418498
Antilope cervicapra	0.855946772	1	1	50	0.798022609	0.063809858
Callithrix argentata	0.85567819	1	1	50	0.789861277	0.06398641
Lepus flavigularis	0.855432338	1	1	50	0.773908008	0.076811037
Saguinus midas	0.855253104	1	1	50	0.800670771	0.064492817
Peromyscus leucopus	0.855138032	1	1	47	0.712659576	0.137542603
Odocoileus hemionus	0.855067688	1	1	50	0.770701205	0.069256524
Eulemur coronatus	0.854565634	1	1	50	0.807124195	0.049835257
Haplonycteris fischeri	0.85445018	1	1	50	0.763560966	0.07787472
Petinomys sagitta	0.854434718	1	1	50	0.751512291	0.08306331
Herpestes semitorquatus	0.854361708	1	1	50	0.794347168	0.078249926
Dasyprocta coibae	0.854307742	1	1	50	0.777054513	0.06421937
Rousettus amplexicaudatus	0.853906991	1	1	50	0.777300931	0.080955211
Sundamys infraluteus	0.853653608	1	1	50	0.800767584	0.070134207
Mazama pandora	0.853593269	1	1	50	0.805155836	0.051589688
Prionailurus iriomotensis	0.853407027	1	1	50	0.745847942	0.080482457
Leopoldamys siporanus	0.8533005	1	1	50	0.7614757	0.074955041
Paraleptomys rufilatus	0.853073314	1	1	50	0.749557254	0.080696045
Tragulus kanchil	0.853027529	1	1	50	0.820225088	0.05612739
Saccolaimus saccolaimus	0.852514609	1	1	50	0.724227115	0.083096984
Petinomys lugens	0.852320646	1	1	50	0.764607754	0.075143246
Ailurops ursinus	0.852096103	1	1	50	0.805145695	0.067925141
Rheomys underwoodi	0.851517949	1	1	50	0.725339026	0.078579173
Rattus mindorensis	0.851509858	1	1	50	0.784080925	0.081201319
Babyrousa togeanensis	0.850909182	1	1	50	0.779852245	0.066930611
Dendrohyrax dorsalis	0.850818958	1	1	50	0.789566026	0.063386365
Callicebus brunneus	0.850766813	1	1	50	0.799755844	0.05634856
Pteropus conspicillatus	0.850760133	1	1	49	0.765495335	0.088639238
Pteropus lylei	0.850722307	1	1	50	0.804980885	0.07426207
Callithrix marcai	0.850508366	1	1	50	0.773175718	0.068024693
Archboldomys luzonensis	0.850398473	1	1	50	0.735569558	0.080157711
Dendrolagus ursinus	0.850251666	1	1	50	0.780366715	0.068555883
Pteropus neohibernicus	0.850033435	1	1	50	0.770514724	0.074780369
Cynopterus minutus	0.849888326	1	1	50	0.768657963	0.080185397
Lepilemur edwardsi	0.84968135	1	1	50	0.778080122	0.06450925
Petinomys mindanensis	0.84963076	1	1	50	0.77906815	0.067994307
Pteropus howensis	0.849618441	1	1	50	0.751496886	0.068330992
Rattus morotaiensis	0.84949752	1	1	50	0.76476186	0.076808565
Prionodon linsang	0.849130386	1	1	50	0.79422559	0.076692859
Callithrix emiliae	0.848857495	1	1	50	0.782962818	0.062758501
Callithrix chrysoleuca	0.848732268	1	1	50	0.792203916	0.070584382
Pteropus aruensis	0.848498871	1	1	50	0.7717715	0.075101434
Rheomys raptor	0.848424437	1	1	50	0.726000947	0.078323784
Ammodorcas clarkei	0.847835223	1	1	50	0.784089484	0.059462067
Pithecia aequatorialis	0.847696031	1	1	50	0.797661538	0.056743171
Dobsonia inermis	0.847289487	1	1	50	0.745075919	0.081043381
Mustela sibirica	0.847244301	1	1	49	0.688676834	0.110552999
Sylvilagus dicei	0.846882943	1	1	50	0.763748859	0.082984194
Tarsius tarsier	0.84679748	1	1	49	0.751551131	0.092836761
Saguinus niger	0.846675112	1	1	50	0.809955664	0.0576181
Diplogale hosei	0.846610459	1	1	50	0.793547159	0.063499218
Syntheosciurus brochus	0.846571286	1	1	50	0.762581814	0.073914095
Cacajao melanocephalus	0.846506753	1	1	50	0.806978644	0.060946474
Callithrix mauesi	0.846454125	1	1	50	0.789797029	0.064872112
Kadarsanomys sodyi	0.846395192	1	1	50	0.753631073	0.081600476
Tupaia palawanensis	0.845735995	1	1	50	0.775281427	0.071752393
Cercopithecus albogularis	0.844759852	1	1	50	0.821507044	0.050948636
Heterocephalus glaber	0.844600931	1	1	45	0.706830371	0.129277792
Sundasciurus davensis	0.844432975	1	1	50	0.762856214	0.072101366
Rhinolophus subrufus	0.844362496	1	1	50	0.725505613	0.085195562
Gazella subgutturosa	0.844344019	1	1	50	0.76652054	0.064782669
Cercocebus agilis	0.844022286	1	1	50	0.811118514	0.04805459
Pteropus mariannus	0.843817478	1	1	50	0.781371597	0.07081581
Kobus megaceros	0.84368248	1	1	50	0.772298054	0.058836088
Pithecheir parvus	0.843585018	1	1	50	0.764399156	0.076570237
Alouatta nigerrima	0.842997827	1	1	50	0.788259489	0.060958265
Nanger soemmerringii	0.842754827	1	1	50	0.791255554	0.055148713
Chlorocebus tantalus	0.842359795	1	1	50	0.817813755	0.044089826
Galago rondoensis	0.841615476	1	1	50	0.769551625	0.066240577
Bunopithecus hoolock	0.841330157	1	1	50	0.814356464	0.059012783
Eonycteris robusta	0.841172328	1	1	50	0.75072329	0.080024311
Myotis macrotarsus	0.840959317	1	1	50	0.735214232	0.089129227
Colobus guereza	0.84075568	1	1	50	0.838744788	0.038999731
Galeopterus variegates	0.840650183	1	1	50	0.798976384	0.078332854
Cheiromeles torquatus	0.84047329	1	1	50	0.760666658	0.077461965
Pteropus woodfordi	0.840322429	1	1	50	0.739202999	0.071716641
Cebus libidinosus	0.840314032	1	1	50	0.787565547	0.057845564
Semnopithecus schistaceus	0.839995157	1	1	50	0.793577046	0.061553196
Penthetor lucasi	0.839955253	1	1	50	0.764003581	0.082311124
Oryx beisa	0.839909107	1	1	50	0.763320203	0.067275402
Pteralopex pulchra	0.839734711	1	1	50	0.735961423	0.075691
Rheithrosciurus macrotis	0.839642586	1	1	50	0.788219328	0.070999247
Rattus argentiventer	0.839482127	1	1	50	0.781959835	0.086837572
Rhinolophus acuminatus	0.839386332	1	1	50	0.723307245	0.085372938
Emballonura alecto	0.839068383	1	1	50	0.748055584	0.087255943
Herpestes vitticollis	0.83870835	1	1	50	0.79890922	0.065156933
Herpestes urva	0.838484831	1	1	50	0.746351827	0.084665504
Sundasciurus samarensis	0.838473577	1	1	50	0.76092921	0.070224859
Dorcopsis luctuosa	0.838394561	1	1	50	0.772476078	0.075394263
Procyon pygmaeus	0.838159644	1	1	50	0.780802914	0.068142094
Hipposideros pygmaeus	0.838067531	1	1	50	0.725973434	0.092144941
Exilisciurus concinnus	0.837883389	1	1	50	0.752094811	0.078665913
Callithrix jacchus	0.837571892	1	1	49	0.776001189	0.096335679
Galago granti	0.837518907	1	1	50	0.765954548	0.063632777
Sus celebensis	0.837420513	1	1	50	0.800682475	0.056764334
Tarsomys echinatus	0.837257563	1	1	50	0.707506552	0.077651152
Callicebus medemi	0.837021936	1	1	50	0.77582385	0.063264507
Miopithecus talapoin	0.836881014	1	1	50	0.827574884	0.042681702
Callicebus moloch	0.83671589	1	1	50	0.794512885	0.061499496
Rattus baluensis	0.836715574	1	1	50	0.761572025	0.074721603
Callithrix saterei	0.836609168	1	1	50	0.767174645	0.0771272
Callosciurus albescens	0.836274901	1	1	50	0.786090514	0.070268443
Macroglossus minimus	0.835936273	1	1	50	0.735097081	0.09562557
Giraffa camelopardalis	0.835932005	1	1	50	0.780654809	0.075041709
Saimiri ustus	0.83560261	1	1	50	0.790448962	0.064111798
Pteropus melanopogon	0.835577133	1	1	50	0.754914234	0.080802218
Pteropus rennelli	0.835565964	1	1	50	0.750259159	0.073749769
Otomops formosus	0.835150569	1	1	50	0.6939563	0.083019041
Rattus everetti	0.835025257	1	1	50	0.778121839	0.081419593
Petaurus biacensis	0.835005726	1	1	50	0.761484104	0.084973584
Callithrix leucippe	0.834920043	1	1	50	0.762354951	0.069522543
Alcelaphus buselaphus	0.834800859	1	1	50	0.792249936	0.06576353
Solomys salamonis	0.83449678	1	1	50	0.753345987	0.074222487
Hapalemur alaotrensis	0.834462958	1	1	50	0.782869568	0.051508428
Phalanger orientalis	0.834394174	1	1	50	0.778482188	0.088480013
Petaurillus kinlochii	0.833881281	1	1	50	0.749252682	0.076370181
Melomys bougainville	0.833329084	1	1	50	0.730072274	0.090818587
Uromys rex	0.833283187	1	1	50	0.74663738	0.077850787
Rattus enganus	0.833215392	1	1	50	0.758143599	0.06928704
Rhinolophus canuti	0.83316892	1	1	50	0.686019896	0.086962174
Pteropus caniceps	0.833143286	1	1	50	0.742122257	0.088604032
Ratufa affinis	0.833141215	1	1	50	0.813609577	0.068746377
Iomys horsfieldii	0.833105407	1	1	50	0.777575973	0.075746476
Solomys sapientis	0.832680928	1	1	50	0.758028837	0.077369473
Callicebus baptista	0.832535031	1	1	50	0.793179741	0.058432771
Euoticus pallidus	0.832166419	1	1	50	0.780006222	0.070075076
Babyrousa celebensis	0.831924549	1	1	50	0.777871464	0.065146391
Callicebus barbarabrownae	0.831773642	1	1	50	0.775756923	0.058904042
Capricornis milneedwardsii	0.831679551	1	1	50	0.751508868	0.069177732
Hipposideros nequam	0.831197799	1	1	50	0.720535552	0.080007625
Gazella spekei	0.830913939	1	1	50	0.759434292	0.057992406
Callithrix intermedia	0.830754428	1	1	50	0.772688099	0.06706067
Lariscus obscurus	0.830740431	1	1	50	0.75766691	0.074530231
Neohylomys hainanensis	0.830549875	1	1	50	0.705419651	0.082663015
Pteralopex taki	0.830508106	1	1	50	0.734863915	0.074697272
Callosciurus finlaysonii	0.829962032	1	1	50	0.793232387	0.07186701
Melogale moschata	0.829781679	1	1	50	0.704783528	0.096557748
Callicebus hoffmannsi	0.829753037	1	1	50	0.782613209	0.065789813
Axis porcinus	0.829510854	1	1	50	0.792954605	0.058135725
Neovison vison	0.829266139	1	1	48	0.734808042	0.113008765
Rattus adustus	0.829240671	1	1	50	0.754420595	0.07013284
Cephalophus zebra	0.828985131	1	1	50	0.773486554	0.069921552
Trichys fasciculata	0.828924924	1	1	50	0.785963268	0.075259739
Allenopithecus nigroviridis	0.828682576	1	1	50	0.797360634	0.05215933
Sylvilagus varynaensis	0.82863321	1	1	50	0.73182149	0.069083353
Peromyscus maniculatus	0.828504146	1	1	46	0.71975751	0.146171234
Hemigalus derbyanus	0.828495283	1	1	50	0.793787901	0.077097984
Potos flavus	0.828396314	1	1	50	0.736789108	0.077182904
Aeromys thomasi	0.828298457	1	1	50	0.783890322	0.075306928
Spilocuscus rufoniger	0.828205466	1	1	50	0.781645684	0.073778394
Chrotomys gonzalesi	0.828037619	1	1	50	0.720693592	0.085605517
Rhinolophus virgo	0.827728933	1	1	50	0.716639867	0.091950919
Moschus berezovskii	0.827496474	1	1	50	0.742989591	0.069652254
Melonycteris melanops	0.827391371	1	1	50	0.744336164	0.089138482
Chiropodomys calamianensis	0.826644281	1	1	50	0.736242172	0.076689333
Hipposideros turpis	0.826627767	1	1	50	0.715787507	0.073751794
Podogymnura aureospinula	0.82656144	1	1	50	0.730250547	0.088486351
Moschiola meminna	0.826467573	1	1	50	0.770413711	0.062952328
Cercopithecus doggetti	0.826450155	1	1	50	0.806453119	0.04555146
Dendrolagus inustus	0.826349518	1	1	50	0.771061887	0.08236465
Lariscus niobe	0.826160069	1	1	50	0.745714751	0.079830175
Chiropodomys karlkoopmani	0.826141992	1	1	50	0.725287275	0.078166667
Ursus maritimus	0.826062531	1	0	47	0.702462027	0.102784694
Alouatta sara	0.825918355	1	0	50	0.774101714	0.057604159
Leontopithecus rosalia	0.82584222	1	0	50	0.745698254	0.066304743
Piliocolobus gordonorum	0.825729135	1	0	50	0.76547631	0.051498392
Arctocebus calabarensis	0.824737731	1	0	50	0.767448643	0.082098831
Capra falconeri	0.824571719	1	0	50	0.736303003	0.070971929
Cercopithecus denti	0.824561349	1	0	50	0.810476721	0.050158949
Pteropus lombocensis	0.824434917	1	0	50	0.73762765	0.078643096
Megaerops ecaudatus	0.824200372	1	0	50	0.759829022	0.079189824
Euoticus elegantulus	0.823945698	1	0	50	0.784173533	0.061743401
Apomys littoralis	0.823941459	1	0	50	0.727604498	0.086439589
Phaner pallescens	0.823363048	1	0	50	0.767076521	0.051068342
Syconycteris carolinae	0.823265977	1	0	50	0.719503716	0.090482461
Equus grevyi	0.8219454	1	0	50	0.754368987	0.068659496
Muntiacus rooseveltorum	0.821886542	1	0	50	0.743383916	0.06059776
Callithrix flaviceps	0.82171941	1	0	50	0.754278126	0.065930615
Melonycteris fardoulisi	0.821523685	1	0	49	0.716632515	0.07848735
Mungos gambianus	0.820483543	1	0	50	0.774140283	0.071278993
Maxomys whiteheadi	0.820349816	1	0	50	0.765050561	0.082153063
Sundasciurus juvencus	0.820146577	1	0	50	0.753406628	0.069806773
Microtus ochrogaster	0.819991258	1	0	46	0.699682913	0.134152663
Microcebus ravelobensis	0.819875769	1	0	50	0.759950774	0.055981798
Niviventer cameroni	0.81956405	1	0	50	0.749332317	0.082572842
Pteralopex atrata	0.81953698	1	0	50	0.737035119	0.074889269
Sundasciurus rabori	0.819244797	1	0	50	0.751706838	0.070305782
Hapalemur griseus	0.819208961	1	0	50	0.795762238	0.051412756
Pteropus admiralitatum	0.819118822	1	0	50	0.739419923	0.072644399
Crateromys australis	0.81906473	1	0	50	0.720200545	0.082538007
Herpestes fuscus	0.819022211	1	0	50	0.770216551	0.077302755
Pteropus speciosus	0.818949327	1	0	49	0.719132601	0.075828775
Viverra zibetha	0.818941089	1	0	50	0.782484565	0.077817732
Hydrochoerus isthmius	0.818727599	1	0	50	0.778979298	0.063359953
Hapalomys longicaudatus	0.818624451	1	0	50	0.753425181	0.082436861
Orthogeomys cavator	0.818516367	1	0	50	0.73991185	0.074473582
Cephalophus jentinki	0.818503258	1	0	50	0.78164536	0.068664814
Colobus angolensis	0.818418703	1	0	50	0.801211852	0.044118465
Cephalophus niger	0.818245828	1	0	50	0.796108689	0.063187078
Petinomys setosus	0.818146467	1	0	50	0.768726311	0.07284558
Sundamys muelleri	0.818047897	1	0	50	0.768492292	0.079901089
Nyctimene vizcaccia	0.817718323	1	0	50	0.725866324	0.079793026
Callimico goeldii	0.817583069	1	0	50	0.761964847	0.068180671
Callithrix kuhlii	0.817490667	1	0	50	0.789167253	0.067259819
Petinomys hageni	0.817423571	1	0	50	0.76432193	0.073760334
Rhinolophus inops	0.817396245	1	0	50	0.716954162	0.080529032
Callicebus cinerascens	0.817362597	1	0	50	0.753267869	0.069585638
Tupaia minor	0.816972163	1	0	50	0.758382393	0.08925751
Paradoxurus zeylonensis	0.816894305	1	0	50	0.78831363	0.081080477
Crossarchus ansorgei	0.81566478	1	0	49	0.744802513	0.08489636
Aotus miconax	0.815518477	1	0	50	0.745587129	0.063935547
Sundasciurus steerii	0.815360941	1	0	50	0.74894373	0.070482318
Martes pennanti	0.815125452	1	0	48	0.653512113	0.088100905
Brachyteles hypoxanthus	0.815095122	1	0	50	0.749307788	0.06250988
Babyrousa babyrussa	0.814983727	1	0	50	0.739737577	0.081836718
Hipposideros coxi	0.814919287	1	0	50	0.707965498	0.082426206
Petaurus abidi	0.814682869	1	0	50	0.750259502	0.084683485
Saguinus martinsi	0.814616271	1	0	50	0.758636296	0.069497892
Dendrogale murina	0.814480915	1	0	50	0.748530999	0.085463158
Kobus kob	0.814153022	1	0	50	0.767650005	0.066625991
Lepilemur microdon	0.814077091	1	0	50	0.753096937	0.06257936
Tarsomys apoensis	0.813478828	1	0	50	0.708024557	0.077542004
Cercopithecus lhoesti	0.81276142	1	0	50	0.806549259	0.05142939
Oryzomys talamancae	0.812586679	1	0	50	0.759110353	0.080833478
Coendou rothschildi	0.812569176	1	0	50	0.783710026	0.06768386
Crunomys melanius	0.812514378	1	0	50	0.753283557	0.072398063
Pseudochirops albertisii	0.812407179	1	0	50	0.74518443	0.087859679
Mazama bricenii	0.812308495	1	0	50	0.743401683	0.063855447
Chlorocebus djamdjamensis	0.81219174	1	0	50	0.761830918	0.061994718
Hipposideros halophyllus	0.812138165	1	0	50	0.69076584	0.087364273
Taphozous achates	0.812129702	1	0	50	0.712946611	0.069217019
Ovis ammon	0.811827199	1	0	50	0.723227389	0.070137918
Bassaricyon lasius	0.811368876	1	0	50	0.745452956	0.069077162
Lepilemur ruficaudatus	0.811303459	1	0	50	0.735227324	0.064851099
Solomys salebrosus	0.811117049	1	0	50	0.734399407	0.076745169
Lepilemur dorsalis	0.810702054	1	0	50	0.755976385	0.061377586
Eulemur collaris	0.8106861	1	0	50	0.754606504	0.056206659
Oryzomys bolivaris	0.810483146	1	0	50	0.76136202	0.080034925
Cebus nigritus	0.810435274	1	0	50	0.783446457	0.052181236
Cercopithecus solatus	0.810269855	1	0	50	0.779287034	0.057938814
Saguinus inustus	0.810024586	1	0	50	0.738356543	0.081083448
Madoqua kirkii	0.809683181	1	0	50	0.740558225	0.068040966
Eulemur albocollaris	0.809652505	1	0	50	0.762397749	0.056567646
Rattus palmarum	0.80959706	1	0	50	0.759948393	0.074055642
Hipposideros demissus	0.809429868	1	0	50	0.712537383	0.076950244
Phloeomys pallidus	0.809337531	1	0	50	0.763029041	0.072890625
Callithrix acariensis	0.809304131	1	0	50	0.75064118	0.070398303
Palawanomys furvus	0.80887129	1	0	50	0.750978524	0.072476537
Chironax melanocephalus	0.808783454	1	0	50	0.741297629	0.081419736
Herpestes naso	0.808675331	1	0	50	0.761791635	0.071793775
Kerivoula picta	0.808111521	1	0	49	0.709967428	0.09344369
Rhynchomys isarogensis	0.807990305	1	0	50	0.71071366	0.082491697
Otomops johnstonei	0.807862377	1	0	49	0.688868352	0.086805795
Bandicota savilei	0.807594608	1	0	50	0.744586296	0.083755567
Bison bison	0.80752775	1	0	49	0.727986935	0.074320345
Dobsonia beauforti	0.807299162	1	0	49	0.711478244	0.075438395
Crocidura maxi	0.807078116	1	0	49	0.695179718	0.098250174
Pteropus pohlei	0.806964681	1	0	50	0.707261898	0.089324122
Megaderma spasma	0.806930985	1	0	50	0.722436277	0.071216215
Nyctimene keasti	0.806680275	1	0	50	0.720024393	0.083188389
Niviventer fraternus	0.806639146	1	0	50	0.751560567	0.083415334
Crocidura grayi	0.806412514	1	0	49	0.700285369	0.094073652
Sus salvanius	0.806310999	1	0	50	0.796391041	0.058560231
Ptenochirus minor	0.80610008	1	0	50	0.735721916	0.084567444
Ochotona princeps	0.806083733	1	0	42	0.669793175	0.150525045
Capra walie	0.805963303	1	0	50	0.742498806	0.054136586
Hipposideros sorenseni	0.805793571	1	0	50	0.683529454	0.086949464
Saguinus pileatus	0.80578994	1	0	50	0.750955018	0.074914236
Litocranius walleri	0.805642748	1	0	50	0.757547422	0.064011832
Vulpes cana	0.805330436	1	0	48	0.71136875	0.103232425
Dasyprocta mexicana	0.805304963	1	0	50	0.772891533	0.069592751
Batomys salomonseni	0.805272268	1	0	50	0.731993082	0.0847204
Mustela kathiah	0.804858528	1	0	49	0.652365407	0.098607735
Niviventer hinpoon	0.804812446	1	0	50	0.730841885	0.079081057
Dobsonia magna	0.804703976	1	0	50	0.731498628	0.068195399
Mydaus javanensis	0.804659602	1	0	50	0.780032729	0.077760035
Oreonax flavicauda	0.804273417	1	0	50	0.761506768	0.070044195
Epixerus ebii	0.80411263	1	0	50	0.751082554	0.078920339
Oryzomys macconnelli	0.804035995	1	0	49	0.729646786	0.087612747
Solenodon cubanus	0.803923067	1	0	50	0.738076292	0.072225158
Phoniscus jagorii	0.803083089	1	0	49	0.700679893	0.095861869
Paradoxurus jerdoni	0.802991173	1	0	50	0.793110974	0.074908011
Bradypus pygmaeus	0.802853757	1	0	50	0.710770288	0.070649819
Pteropus insularis	0.802725901	1	0	50	0.757367649	0.076454346
Pteropus seychellensis	0.801907442	1	0	50	0.740559593	0.065411042
Leopoldamys ciliatus	0.801733948	1	0	50	0.746747411	0.080269903
Galago gabonensis	0.801689582	1	0	49	0.748855062	0.069501721
Apomys sacobianus	0.800851596	1	0	50	0.712047859	0.084336334
Redunca redunca	0.800833369	1	0	50	0.763622961	0.063850016
Lutra lutra	0.800645762	1	0	50	0.726393979	0.090181541
Lepus hainanus	0.800558676	1	0	49	0.690480755	0.079387124
Trachypithecus shortridgei	0.800525085	1	0	50	0.735872171	0.071690948
Crocidura negrina	0.800297215	1	0	49	0.688513552	0.088031817
Styloctenium wallacei	0.800220673	1	0	50	0.712748515	0.079526197
Piliocolobus foai	0.800104725	1	0	50	0.758290441	0.053543593
Beatragus hunteri	0.799622799	1	0	50	0.702213167	0.066981103
Nyctimene malaitensis	0.799574486	1	0	50	0.713954175	0.076263325
Antilocapra americana	0.799538399	1	0	50	0.720093231	0.075856889
Ursus americanus	0.798991783	1	0	50	0.727486649	0.098249278
Neotragus batesi	0.798960903	1	0	50	0.751587106	0.057338042
Microcebus berthae	0.79874208	1	0	50	0.717367203	0.065277197
Apomys musculus	0.79873767	1	0	50	0.717983303	0.089462319
Philantomba maxwellii	0.798477036	1	0	50	0.775101562	0.062945303
Acerodon celebensis	0.798471966	1	0	50	0.731978471	0.072252326
Myotis oreias	0.797830598	1	0	50	0.697385918	0.088265841
Maxomys pagensis	0.797760902	1	0	50	0.733482863	0.079167719
Tupaia chrysogaster	0.797674382	1	0	50	0.718733931	0.088249864
Gazella leptoceros	0.797530669	1	0	50	0.698814917	0.063760845
Glischropus tylopus	0.797510995	1	0	50	0.702564326	0.091575799
Rattus annandalei	0.797144273	1	0	50	0.751486403	0.073108479
Loxodonta cyclotis	0.797077129	1	0	50	0.774351072	0.068833548
Pteropus mahaganus	0.797038737	1	0	50	0.716614102	0.078441793
Cynopterus nusatenggara	0.796968277	1	0	49	0.708361187	0.087259197
Ovis canadensis	0.796802595	1	0	50	0.730861086	0.073586273
Arctictis binturong	0.796407124	1	0	50	0.805994492	0.064846231
Eulemur macaco	0.795921483	1	0	50	0.768208414	0.050197232
Dasyprocta fuliginosa	0.795197587	1	0	50	0.745369892	0.072360724
Bradypus tridactylus	0.794813287	1	0	50	0.729355123	0.072289934
Dendrolagus spadix	0.794734056	1	0	49	0.735291691	0.09862857
Hipposideros obscurus	0.794714894	1	0	49	0.69028204	0.09652493
Solenodon paradoxus	0.794123887	1	0	50	0.741997908	0.077499872
Rattus ranjiniae	0.794015731	1	0	50	0.725740361	0.074141667
Mustela africana	0.793832266	1	0	48	0.680288578	0.091096005
Vandeleuria nolthenii	0.793367758	1	0	50	0.706407696	0.091151855
Rattus stoicus	0.793052913	1	0	50	0.739135511	0.077418061
Callithrix nigriceps	0.793048306	1	0	50	0.732069003	0.083182859
Rattus feliceus	0.792937492	1	0	50	0.715562623	0.091067429
Dorcopsulus vanheurni	0.792866457	1	0	50	0.737272438	0.073336559
Dasyprocta ruatanica	0.792784879	1	0	50	0.752915759	0.063564396
Eptesicus dimissus	0.792633013	1	0	50	0.707578437	0.078721441
Spilocuscus kraemeri	0.792558933	1	0	50	0.727192669	0.076426635
Callosciurus caniceps	0.792549699	1	0	50	0.773201777	0.079388305
Lemur catta	0.792522506	1	0	50	0.762225494	0.054435648
Rattus tiomanicus	0.792254237	1	0	50	0.765524047	0.088143366
Gazella arabica	0.792237584	1	0	50	0.743767021	0.059609338
Enhydra lutris	0.791832663	1	0	47	0.681700652	0.106192132
Aotus azarae	0.791262396	1	0	50	0.741244841	0.063061661
Rattus lugens	0.791127788	1	0	50	0.733231734	0.083642283
Pardofelis marmorata	0.790169593	1	0	50	0.754957144	0.071444089
Melomys arcium	0.789722601	1	0	50	0.689763096	0.09544251
Bullimus luzonicus	0.789391001	1	0	50	0.733834272	0.07931784
Callicebus melanochir	0.789339732	1	0	50	0.762542246	0.060299544
Puma concolor	0.789276354	1	0	47	0.716206639	0.098204701
Hipposideros orbiculus	0.789161302	1	0	50	0.68152181	0.081894974
Mesocapromys angelcabrerai	0.789047769	1	0	50	0.705169934	0.070289282
Kobus ellipsiprymnus	0.78892486	1	0	50	0.752830937	0.076435451
Neotragus moschatus	0.788813581	1	0	50	0.710230352	0.065309253
Bassaricyon beddardi	0.788330081	1	0	49	0.707947166	0.082601292
Macaca assamensis	0.788157632	1	0	50	0.76848225	0.065306516
Sundasciurus philippinensis	0.788046406	1	0	50	0.739528783	0.078683412
Maxomys rajah	0.788036733	1	0	50	0.756910746	0.078818116
Myotis horsfieldii	0.788031582	1	0	49	0.688322889	0.097723749
Iomys sipora	0.787187597	1	0	50	0.732646248	0.074001256
Pteropus molossinus	0.787055264	1	0	50	0.715782547	0.070639457
Dobsonia emersa	0.7870509	1	0	49	0.694889484	0.086707634
Naemorhedus caudatus	0.787030484	1	0	50	0.700143793	0.074080395
Hipposideros sumbae	0.78694162	1	0	50	0.688938535	0.088516487
Nesolagus timminsi	0.786929914	1	0	50	0.668496275	0.068592958
Taurotragus derbianus	0.786886769	1	0	50	0.748239054	0.060854004
Dendrolagus goodfellowi	0.786848792	1	0	50	0.75691332	0.079891321
Petaurista alborufus	0.786743473	1	0	50	0.703188102	0.081466905
Orthogeomys thaeleri	0.786701435	1	0	48	0.710393347	0.08669963
Maxomys panglima	0.786542477	1	0	50	0.734042227	0.083318778
Hyemoschus aquaticus	0.786291139	1	0	50	0.779706352	0.05944052
Galidictis grandidieri	0.786135155	1	0	49	0.672561696	0.066834035
Tupaia longipes	0.786008575	1	0	50	0.740531751	0.090573412
Eulemur albifrons	0.786005461	1	0	50	0.75740487	0.056788657
Strigocuscus celebensis	0.785941862	1	0	50	0.712458275	0.083268842
Echymipera davidi	0.785872135	1	0	50	0.712014599	0.084036314
Oryx dammah	0.785373258	1	0	50	0.689829113	0.066829625
Miopithecus ogouensis	0.785351456	1	0	50	0.75350927	0.066074555
Cephalophus callipygus	0.785102303	1	0	50	0.757684229	0.071023145
Cheirogaleus medius	0.784591667	1	0	50	0.758599794	0.073197536
Crocidura grandis	0.784360159	1	0	49	0.686780233	0.092775639
Thylogale brunii	0.784161427	1	0	50	0.699249072	0.092453704
Hipposideros lylei	0.784110136	1	0	49	0.709231247	0.091876918
Niviventer cremoriventer	0.783830394	1	0	50	0.755828862	0.077617656
Sphiggurus melanurus	0.783277516	1	0	49	0.713691743	0.078378671
Mesocapromys auritus	0.783113079	1	0	50	0.714135609	0.077887691
Microtus guentheri	0.78308099	1	0	46	0.670529106	0.106191664
Tylomys watsoni	0.783000579	1	0	50	0.722896372	0.086174821
Macroglossus sobrinus	0.782501888	1	0	50	0.713621199	0.081354446
Paraleptomys wilhelmina	0.782477975	1	0	49	0.656669256	0.091250834
Zaglossus attenboroughi	0.782445116	1	0	49	0.717710119	0.084478458
Galago matschiei	0.782282444	1	0	50	0.730772153	0.07049797
Tupaia montana	0.781837427	1	0	50	0.732999485	0.092825363
Hemitragus jayakari	0.7817648	1	0	50	0.73506603	0.069225538
Taeromys callitrichus	0.780917918	1	0	49	0.685669895	0.0881142
Galictis vittata	0.780877176	1	0	49	0.73621218	0.087816925
Cephalophus brookei	0.78075335	1	0	50	0.763283703	0.069042949
Callithrix melanura	0.780206629	1	0	48	0.709548223	0.081068644
Hyosciurus heinrichi	0.780150825	1	0	50	0.705487636	0.0748199
Emballonura serii	0.779960846	1	0	48	0.683139077	0.089748533
Eira barbara	0.779941798	1	0	50	0.741760617	0.082129497
Tylomys panamensis	0.779890397	1	0	49	0.659362532	0.084250335
Dendrolagus dorianus	0.779811575	1	0	50	0.731474519	0.081375797
Cryptomys zechi	0.779752204	1	0	50	0.706077124	0.073957188
Hyaena hyaena	0.779713767	1	0	50	0.76809879	0.071263024
Martes flavigula	0.779668741	1	0	48	0.696874237	0.099868935
Callithrix manicorensis	0.779649797	1	0	49	0.715907667	0.086808968
Chimarrogale phaeura	0.77957254	1	0	50	0.694305329	0.084082249
Melogale personata	0.779564072	1	0	50	0.73502555	0.096133902
Dasyprocta guamara	0.779513724	1	0	50	0.725993447	0.067194913
Maxomys alticola	0.779401428	1	0	50	0.713931691	0.074567299
Pteropus chrysoproctus	0.779338076	1	0	50	0.701160609	0.087769842
Hipposideros armiger	0.779048978	1	0	46	0.657870871	0.117078636
Apomys abrae	0.779035693	1	0	48	0.672508482	0.098220679
Callicebus donacophilus	0.77891601	1	0	49	0.716000673	0.069892897
Berylmys berdmorei	0.778617759	1	0	50	0.750289398	0.081416303
Haeromys margarettae	0.778611331	1	0	50	0.693874362	0.082037435
Saguinus leucopus	0.778560826	1	0	50	0.757899145	0.063308255
Dasyprocta prymnolopha	0.778552807	1	0	50	0.73712616	0.066431698
Nyctimene major	0.778509704	1	0	49	0.711309978	0.083108254
Hystrix brachyura	0.778308607	1	0	49	0.710587951	0.085687731
Tupaia splendidula	0.778281276	1	0	50	0.73463309	0.08376461
Myotis moluccarum	0.77827336	1	0	50	0.682434225	0.097036046
Pteropus banakrisi	0.777776804	1	0	49	0.707295273	0.085301077
Oryzomys gorgasi	0.777698201	1	0	50	0.724838903	0.079609834
Sundasciurus fraterculus	0.777656553	1	0	50	0.7112792	0.081354511
Taphozous melanopogon	0.777603397	1	0	50	0.670370074	0.076212889
Avahi laniger	0.777581873	1	0	50	0.757879625	0.063510658
Gerbillus nanus	0.777279401	1	0	47	0.661120811	0.101041812
Arctocebus aureus	0.777234279	1	0	50	0.730686263	0.074768269
Urocyon littoralis	0.777062748	1	0	46	0.669041674	0.09439903
Kerivoula papillosa	0.776832918	1	0	50	0.706144281	0.086981391
Pteropus temminckii	0.776820055	1	0	48	0.670714309	0.082376217
Capra pyrenaica	0.776723429	1	0	49	0.705081153	0.088695223
Tragelaphus eurycerus	0.776643081	1	0	50	0.749546278	0.063873624
Callistomys pictus	0.77658432	1	0	49	0.683446441	0.08025923
Dobsonia crenulata	0.776447121	1	0	50	0.704235291	0.087151072
Eudorcas rufifrons	0.776410511	1	0	50	0.729459754	0.061949864
Callithrix humilis	0.776404165	1	0	49	0.715509864	0.086506589
Microtus pinetorum	0.776367286	1	0	48	0.648958687	0.114094057
Phaner parienti	0.77628767	1	0	50	0.733866793	0.057607684
Cebus xanthosternos	0.776167903	1	0	49	0.761602376	0.064298543
Epomops buettikoferi	0.776102406	1	0	50	0.735039083	0.078901911
Pteropus ornatus	0.775892003	1	0	50	0.678404124	0.068886626
Pteropus personatus	0.77571058	1	0	49	0.689124116	0.088944539
Pteropus tuberculatus	0.775234312	1	0	49	0.69344094	0.071862504
Tamiops rodolphii	0.774808781	1	0	50	0.730873128	0.077436732
Rusa unicolor	0.774206641	1	0	50	0.743243735	0.072484494
Taeromys celebensis	0.77418136	1	0	49	0.697751799	0.08609464
Pteropus giganteus	0.773927512	1	0	50	0.717691373	0.080050351
Oryzomys rostratus	0.773745716	1	0	50	0.719930208	0.080370718
Kerivoula pellucida	0.773689701	1	0	50	0.699478417	0.092661482
Rhinolophus montanus	0.773638329	1	0	50	0.683310027	0.083444977
Dobsonia exoleta	0.773580455	1	0	50	0.707341454	0.082090841
Hipposideros madurae	0.773277012	1	0	49	0.661360035	0.092252296
Hipposideros dinops	0.773002903	1	0	49	0.67754964	0.079225102
Ceratotherium simum	0.772575373	1	0	45	0.686315429	0.120965101
Hylopetes platyurus	0.772405082	1	0	49	0.748305467	0.081509629
Pogonomys fergussoniensis	0.771681876	1	0	50	0.687349801	0.088657762
Tupaia nicobarica	0.771674234	1	0	50	0.718050821	0.073907026
Mysateles prehensilis	0.771520309	1	0	50	0.724179607	0.081435491
Phalanger matabiru	0.771361744	1	0	50	0.705070747	0.091024568
Manis gigantea	0.771360762	1	0	50	0.745184358	0.0704839
Perodicticus potto	0.770976904	1	0	50	0.736601466	0.065432788
Equus hemionus	0.770574919	1	0	49	0.680912268	0.07299749
Tapirus bairdii	0.770467621	1	0	50	0.752215901	0.071603125
Pteropus capistratus	0.770168382	1	0	49	0.703933104	0.07977233
Naemorhedus griseus	0.770157731	1	0	50	0.692126581	0.069401631
Hipposideros crumeniferus	0.769961323	1	0	49	0.669794555	0.085504716
Taphozous theobaldi	0.769829976	1	0	50	0.708796242	0.080045175
Eulemur fulvus	0.769672219	1	0	50	0.744912072	0.075069892
Bradypus variegatus	0.769418586	1	0	50	0.724586669	0.069826721
Cercopithecus hamlyni	0.768979761	1	0	50	0.767719208	0.058857661
Maxomys inflatus	0.768927647	1	0	50	0.733550159	0.080534163
Brachyphylla cavernarum	0.768847658	1	0	50	0.69337782	0.074341471
Balionycteris maculata	0.768814184	1	0	50	0.719685439	0.083356551
Thylogale browni	0.768483334	1	0	50	0.708808901	0.075748502
Aotus hershkovitzi	0.768405263	1	0	50	0.738922401	0.060837083
Nycteris javanica	0.768180497	1	0	50	0.663256744	0.08382357
Dyacopterus brooksi	0.768069071	1	0	50	0.719861939	0.072212658
Dyacopterus spadiceus	0.768062306	1	0	50	0.731815227	0.082717605
Chimarrogale hantu	0.767711528	1	0	50	0.682600678	0.086421054
Maxomys surifer	0.767054664	1	0	50	0.736491591	0.080866038
Prionailurus planiceps	0.766502131	1	0	50	0.778592766	0.07414982
Dorcatragus megalotis	0.766417975	1	0	50	0.718739154	0.068366538
Thylogale lanatus	0.766397247	1	0	50	0.680821199	0.0777977
Lepilemur mustelinus	0.766360243	1	0	50	0.731208126	0.070187054
Rubrisciurus rubriventer	0.766336977	1	0	50	0.712079765	0.07855629
Leopoldamys neilli	0.766143638	1	0	50	0.692921544	0.086966208
Heliosciurus punctatus	0.765891188	1	0	50	0.733726574	0.083627739
Funisciurus anerythrus	0.765728855	1	0	49	0.701847102	0.074889125
Crocidura beatus	0.765666668	1	0	49	0.689904888	0.092170488
Bunomys penitus	0.765657719	1	0	49	0.669312961	0.080136759
Galago zanzibaricus	0.765604942	1	0	50	0.716301339	0.075851205
Phalanger alexandrae	0.76534617	1	0	50	0.692734277	0.090916538
Cephalophus dorsalis	0.765345249	1	0	50	0.759506379	0.067799635
Menetes berdmorei	0.765230528	1	0	50	0.746980009	0.080037586
Pteropus dasymallus	0.765053242	1	0	47	0.646618114	0.091534264
Anomalurus pelii	0.764321393	1	0	50	0.760673435	0.078809036
Sciurus igniventris	0.764294875	1	0	48	0.699808604	0.086180434
Falsistrellus mordax	0.764260299	1	0	49	0.669002713	0.092311657
Rhynchocyon petersi	0.764080573	1	0	49	0.696305812	0.077916156
Jaculus jaculus	0.763826775	1	0	43	0.683502279	0.161702435
Falsistrellus petersi	0.763218621	1	0	49	0.686434685	0.094573187
Orthogeomys dariensis	0.762559894	1	0	48	0.707574566	0.08489449
Neopteryx frosti	0.762423646	1	0	50	0.676550443	0.07260887
Ratufa indica	0.762353978	1	0	50	0.764581326	0.078327929
Macropus bernardus	0.762145383	1	0	48	0.663214364	0.098285266
Funisciurus leucogenys	0.762066106	1	0	50	0.713222871	0.08046412
Genetta thierryi	0.76191971	1	0	49	0.735640792	0.075609708
Hesperoptenus blanfordi	0.761889535	1	0	50	0.706681695	0.086275999
Papagomys armandvillei	0.761769352	1	0	49	0.674636209	0.085395771
Rattus xanthurus	0.761595866	1	0	49	0.67619874	0.077299611
Crossarchus obscurus	0.761358742	1	0	50	0.730850445	0.082963533
Pogonomelomys bruijni	0.761355618	1	0	49	0.704637269	0.0913903
Prionailurus rubiginosus	0.761343407	1	0	49	0.707771553	0.087308285
Pteropus nitendiensis	0.760713305	1	0	50	0.69267917	0.074917024
Mysateles meridionalis	0.760540969	1	0	48	0.674469337	0.078911579
Echymipera clara	0.759924799	1	0	50	0.717906497	0.094714319
Capromys pilorides	0.759908985	1	0	50	0.688194741	0.075490473
Leontopithecus chrysopygus	0.759769013	1	0	50	0.726628025	0.067378161
Lagothrix lugens	0.759599681	1	0	50	0.748424893	0.062018253
Rhinolophus nereis	0.759385602	1	0	50	0.66603534	0.079667335
Funisciurus substriatus	0.759248858	1	0	50	0.694079448	0.075014741
Microtus oeconomus	0.759149505	1	0	45	0.643329561	0.119972349
Pteropus pselaphon	0.759033709	1	0	48	0.637393005	0.085475144
Cercopithecus kandti	0.758700644	1	0	50	0.726821809	0.054675394
Hipposideros diadema	0.758633047	1	0	49	0.685085147	0.08883843
Rattus hoffmanni	0.758617217	1	0	49	0.69777752	0.082367317
Leopardus wiedii	0.758350407	1	0	50	0.712432568	0.07996195
Tupaia javanica	0.758291358	1	0	49	0.682021125	0.090249775
Thoopterus nigrescens	0.758075738	1	0	49	0.696315138	0.078666557
Cheirogaleus ravus	0.758042577	1	0	50	0.717857142	0.075080309
Myodes shanseius	0.758029147	1	0	43	0.611834254	0.108784397
Isothrix bistriata	0.757939176	1	0	48	0.679606046	0.085159589
Capricornis thar	0.757708673	1	0	49	0.725468576	0.076308171
Thylogale calabyi	0.757097201	1	0	50	0.668813626	0.07228759
Rhinolophus borneensis	0.75691826	1	0	49	0.683368508	0.089434035
Budorcas taxicolor	0.756830525	1	0	49	0.690962768	0.079243801
Phaner furcifer	0.756420884	1	0	50	0.743575669	0.064523609
Nanger granti	0.75633969	1	0	50	0.706664445	0.058793364
Oryzomys devius	0.756283869	1	0	50	0.719572378	0.083211324
Cricetulus barabensis	0.756009335	1	0	45	0.626028436	0.110082309
Pteropus ualanus	0.75596401	1	0	50	0.702502099	0.07769112
Margaretamys beccarii	0.755581338	1	0	50	0.700816542	0.078568665
Mirza coquereli	0.755398688	1	0	50	0.74239284	0.063109997
Myotis adversus	0.754498379	1	0	47	0.655175727	0.100065316
Prionailurus bengalensis	0.754179549	1	0	49	0.669675007	0.099148864
Pipistrellus stenopterus	0.754028681	1	0	50	0.673369508	0.087278679
Lenomys meyeri	0.754002388	1	0	50	0.704058396	0.082629639
Nyctimene sanctacrucis	0.753924013	1	0	49	0.67400222	0.074409106
Eudorcas thomsonii	0.753854753	1	0	50	0.734245523	0.058465312
Saguinus melanoleucus	0.753693428	1	0	49	0.703714664	0.076763748
Onychogalea unguifera	0.753650691	1	0	48	0.650342168	0.095239136
Rhinolophus madurensis	0.753527747	1	0	46	0.635491674	0.092231171
Petinomys crinitus	0.753447206	1	0	50	0.709550801	0.082548048
Proechimys semispinosus	0.753252471	1	0	50	0.727052719	0.087170315
Harpyionycteris celebensis	0.753049132	1	0	49	0.680219178	0.085295344
Nannosciurus melanotis	0.752951156	1	0	50	0.725249444	0.077718418
Myodes regulus	0.752903008	1	0	43	0.612248274	0.109876087
Lutra nippon	0.752152927	1	0	49	0.682284345	0.076565004
Eulemur rufus	0.752032943	1	0	50	0.715762042	0.059337401
Callithrix pygmaea	0.751936222	1	0	50	0.719740754	0.09136638
Pteropus fundatus	0.75190902	1	0	50	0.686266894	0.076150265
Tateomys rhinogradoides	0.751770753	1	0	49	0.661092088	0.080506118
Neofelis nebulosa	0.751741587	1	0	50	0.736114058	0.082539623
Rupicapra rupicapra	0.751732358	1	0	49	0.703734314	0.075827935
Hipposideros thomensis	0.751544092	1	0	50	0.701291755	0.070024696
Chlorocebus cynosuros	0.751531554	1	0	50	0.744004033	0.051904956
Rattus marmosurus	0.751434813	1	0	48	0.690238831	0.081860864
Apodemus draco	0.751342184	1	0	43	0.629355106	0.107906776
Tragelaphus buxtoni	0.751238175	1	0	50	0.686702856	0.068633411
Chaerephon plicatus	0.751070125	1	0	49	0.664258676	0.090965831
Pteropus livingstonii	0.751063636	1	0	50	0.699428159	0.062087416
Mesembriomys gouldii	0.751037731	1	0	48	0.661320056	0.103128234
Genetta johnstoni	0.750947486	1	0	49	0.723382803	0.086535162
Rhinolophus stheno	0.750556272	1	0	49	0.666956037	0.084419328
Cephalophus spadix	0.750333917	1	0	50	0.704547344	0.077417995
Rhynchomeles prattorum	0.750288969	1	0	48	0.670308976	0.085927187
Maxomys inas	0.750146657	1	0	50	0.704741749	0.084531237
Mammelomys rattoides	0.750053199	1	0	49	0.695425525	0.102600642
Rheomys thomasi	0.75000996	1	0	48	0.641481197	0.079278538
Alcelaphus lichtensteinii	0.749984676	1	0	50	0.709375327	0.066676602
Panthera leo	0.749728944	1	0	50	0.707021012	0.079974629
Hypogeomys antimena	0.749657757	1	0	48	0.706180396	0.082778029
Funisciurus lemniscatus	0.749560008	1	0	49	0.689291463	0.08621266
Damaliscus korrigum	0.749492681	1	0	50	0.702946469	0.073310007
Eonycteris spelaea	0.749397096	1	0	50	0.696614458	0.093986516
Paruromys dominator	0.749354782	1	0	49	0.685636982	0.085075313
Tragelaphus imberbis	0.74932224	1	0	50	0.713769813	0.075682489
Limnomys sibuanus	0.748280745	1	0	50	0.680408577	0.080326386
Rattus bontanus	0.748176727	1	0	49	0.652471226	0.078111608
Panthera pardus	0.748074507	1	0	41	0.653506352	0.159119637
Pteropus griseus	0.748068431	1	0	48	0.676717646	0.086975554
Suncus murinus	0.747580127	1	0	47	0.667528381	0.114293379
Crocidura palawanensis	0.747411249	1	0	49	0.676597453	0.084812917
Tupaia dorsalis	0.747400528	1	0	50	0.714708561	0.087678133
Dobsonia viridis	0.747146638	1	0	48	0.660617915	0.080089666
Cryptoprocta ferox	0.747081961	1	0	50	0.717428984	0.074927656
Microhydromys musseri	0.746964608	1	0	48	0.650693399	0.09443753
Lepus sinensis	0.746736265	1	0	46	0.637272014	0.102246098
Melomys obiensis	0.746673886	1	0	48	0.677167495	0.104789962
Cabassous centralis	0.74655885	1	0	48	0.671291735	0.086181379
Dendrolagus lumholtzi	0.746063829	1	0	50	0.681454592	0.067292198
Galago gallarum	0.746037374	1	0	50	0.686042671	0.079741635
Niviventer lepturus	0.745740741	1	0	49	0.665447488	0.077831913
Mazama americana	0.745731456	1	0	50	0.696922719	0.0597347
Tolypeutes tricinctus	0.745203476	1	0	50	0.711258408	0.064435654
Taphozous longimanus	0.745089172	1	0	50	0.679535141	0.089464558
Allocebus trichotis	0.745086383	1	0	50	0.71811626	0.073050225
Petinomys vordermanni	0.744942934	1	0	50	0.718880977	0.08228667
Tupaia tana	0.744762916	1	0	49	0.728311157	0.084731592
Emballonura monticola	0.744714591	1	0	49	0.675420099	0.081053061
Liberiictis kuhni	0.744592215	1	0	49	0.720868395	0.088416995
Orthogeomys cherriei	0.744533998	1	0	50	0.703244675	0.088051001
Cryptomys foxi	0.743877373	1	0	49	0.667840298	0.076857725
Pteropus tonganus	0.742906728	1	0	50	0.723910194	0.073267067
Mus shortridgei	0.742470073	1	0	49	0.684451821	0.101232331
Hydromys hussoni	0.742373778	1	0	49	0.633806079	0.085813849
Tupaia gracilis	0.742227141	1	0	50	0.713532723	0.088249698
Mesocapromys melanurus	0.742027383	1	0	50	0.730946143	0.070312168
Niviventer rapit	0.742011404	1	0	50	0.724262822	0.085729633
Mustela altaica	0.741685295	1	0	30	0.53184842	0.101584905
Hypsugo vordermanni	0.741310711	1	0	49	0.663529447	0.088960838
Eupleres goudotii	0.741291153	1	0	50	0.709810555	0.07558226
Microtus pennsylvanicus	0.741235842	1	0	43	0.634725658	0.114045604
Choloepus didactylus	0.74115306	1	0	50	0.719884738	0.073912277
Hylopetes lepidus	0.740561743	1	0	50	0.721166231	0.080138601
Ammotragus lervia	0.740200798	1	0	49	0.65529813	0.072738649
Equus caballus	0.74011042	1	0	50	0.665726568	0.072905549
Ozotoceros bezoarticus	0.74008793	1	0	50	0.695095595	0.069415362
Phacochoerus aethiopicus	0.739953279	1	0	50	0.72473276	0.081485267
Nyctimene masalai	0.739505146	1	0	50	0.660391951	0.090844867
Kerivoula whiteheadi	0.739503956	1	0	49	0.689492844	0.096749121
Hyomys goliath	0.738721217	1	0	49	0.698641008	0.085342355
Paramelomys naso	0.738674245	1	0	48	0.653538903	0.101184229
Bradypus torquatus	0.73847269	1	0	50	0.698924423	0.06744571
Pteropus ocularis	0.7381834	1	0	48	0.653338077	0.088309389
Rattus jobiensis	0.738156655	1	0	50	0.688868911	0.090867693
Petinomys genibarbis	0.738081891	1	0	50	0.731951742	0.081122852
Pteropus voeltzkowi	0.73794631	1	0	50	0.679131256	0.067635901
Lutrogale perspicillata	0.737775876	1	0	50	0.77298512	0.085182037
Uncia uncia	0.737735388	1	0	49	0.663717113	0.090023635
Callosciurus prevostii	0.737591217	1	0	50	0.754678686	0.078695644
Mustela frenata	0.737242914	1	0	43	0.597184979	0.095298558
Sciurillus pusillus	0.737026994	1	0	48	0.677254125	0.09300613
Oryx gazella	0.736861288	1	0	49	0.651920511	0.08567608
Pteropus anetianus	0.736827951	1	0	48	0.649379546	0.07236376
Cephalophus rufilatus	0.736765341	1	0	50	0.72610615	0.064411688
Hipposideros breviceps	0.736541959	1	0	49	0.649211356	0.07918127
Manis tetradactyla	0.736344072	1	0	49	0.719049746	0.08003647
Mops mops	0.736282018	1	0	49	0.67206062	0.085638671
Hybomys trivirgatus	0.735989409	1	0	50	0.701185459	0.087405441
Chrotomys whiteheadi	0.735441764	1	0	49	0.661010414	0.086617755
Dendrolagus mbaiso	0.735349976	1	0	49	0.669390886	0.077543305
Arielulus societatis	0.735300376	1	0	49	0.665693054	0.091197318
Cephalophus leucogaster	0.735164857	1	0	50	0.709527722	0.072534355
Sylvilagus insonus	0.734959117	1	0	47	0.630237761	0.076939192
Melomys leucogaster	0.734942551	1	0	48	0.671507926	0.106709398
Callosciurus nigrovittatus	0.734937223	1	0	50	0.753278051	0.077024902
Cuon alpinus	0.734929941	1	0	45	0.62981912	0.106832409
Tylomys fulviventer	0.734810145	1	0	48	0.636972803	0.08685516
Avahi unicolor	0.734373139	1	0	49	0.668858307	0.072418632
Apodemus speciosus	0.734174614	1	0	42	0.603625862	0.108748078
Chaerephon solomonis	0.734017206	1	0	48	0.647023575	0.083087784
Platacanthomys lasiurus	0.733523981	1	0	49	0.683445207	0.08485591
Sigmodon alstoni	0.733247802	1	0	49	0.678674727	0.09197015
Kerivoula agnella	0.733219308	1	0	47	0.654193669	0.09617023
Ctenomys boliviensis	0.733179239	1	0	49	0.631879896	0.073761484
Pteropus yapensis	0.733065967	1	0	49	0.698283564	0.082541991
Myotis rosseti	0.732960161	1	0	49	0.67899639	0.08815385
Capreolus capreolus	0.732620341	1	0	50	0.723969913	0.077938505
Hipposideros bicolor	0.732320788	1	0	47	0.648758264	0.09761515
Pteropus hypomelanus	0.732076655	1	0	49	0.689078283	0.079370395
Bunomys andrewsi	0.732064864	1	0	49	0.674326213	0.082320154
Rattus losea	0.731878422	1	0	49	0.69455491	0.089953677
Tremarctos ornatus	0.73174935	1	0	50	0.678042189	0.068434285
Neophascogale lorentzi	0.731287962	1	0	50	0.663765196	0.074601202
Acomys russatus	0.731254046	1	0	49	0.669122127	0.082574012
Procapra gutturosa	0.731042379	1	0	46	0.618840781	0.078903969
Martes melampus	0.731026626	1	0	48	0.644131477	0.097465325
Otomops wroughtoni	0.730866666	1	0	50	0.653764489	0.073988973
Pteropus faunulus	0.730440036	1	0	50	0.696073709	0.081972444
Murina rozendaali	0.730322665	1	0	49	0.6767415	0.086689824
Dinomys branickii	0.730181077	1	0	50	0.708979467	0.075146014
Apodemus argenteus	0.730092213	1	0	41	0.60568158	0.114014718
Atherurus macrourus	0.729431312	1	0	50	0.716311162	0.079820127
Paracoelops megalotis	0.729408258	1	0	46	0.601787935	0.087361539
Ovibos moschatus	0.728860196	1	0	49	0.664787461	0.076471537
Canis aureus	0.72857751	1	0	50	0.746070627	0.083889795
Apodemus semotus	0.728283284	1	0	46	0.618766361	0.105065512
Sminthopsis virginiae	0.72809109	1	0	44	0.603368462	0.097811211
Mungotictis decemlineata	0.727973354	1	0	48	0.662450605	0.077410812
Rhinolophus beddomei	0.727540156	1	0	49	0.671676246	0.084081472
Paraechinus nudiventris	0.727401173	1	0	49	0.67035768	0.073073184
Mazama rufina	0.727376979	1	0	47	0.674581201	0.081338898
Akodon affinis	0.727290569	1	0	49	0.660265141	0.090749203
Bunomys chrysocomus	0.727118474	1	0	49	0.662904129	0.079565677
Rhizomys sumatrensis	0.727091823	1	0	50	0.712338095	0.100145205
Salanoia concolor	0.727057403	1	0	48	0.695525288	0.0817589
Geomys tropicalis	0.726637112	1	0	49	0.647005851	0.092552851
Geocapromys brownii	0.72659542	1	0	48	0.650607763	0.088771264
Diplomys rufodorsalis	0.726515555	1	0	49	0.681619749	0.086911941
Echimys semivillosus	0.726401268	1	0	48	0.690668151	0.075107675
Callicebus pallescens	0.725476693	1	0	47	0.668626482	0.08556614
Myotis ridleyi	0.725442325	1	0	50	0.677613528	0.091888768
Rhinolophus keyensis	0.725316205	1	0	49	0.669809468	0.087720865
Callicebus ornatus	0.725145132	1	0	50	0.727698866	0.064974734
Crocidura monticola	0.725024849	1	0	48	0.665502739	0.097079388
Hesperoptenus tomesi	0.724691106	1	0	49	0.665227531	0.087872997
Hylomys parvus	0.724666514	1	0	47	0.619798835	0.090711407
Addax nasomaculatus	0.724630932	1	0	49	0.648948511	0.066688855
Vampyrodes caraccioli	0.723917617	1	0	48	0.666890574	0.091422725
Arielulus cuprosus	0.723901786	1	0	49	0.670072878	0.086160438
Leopoldamys edwardsi	0.723559042	1	0	42	0.61697281	0.102565145
Oryzomys polius	0.722863863	1	0	48	0.637577426	0.080773662
Ichthyomys pittieri	0.722532252	1	0	47	0.636376218	0.080911434
Batomys dentatus	0.722442401	1	0	48	0.657249668	0.091262447
Rhinolophus coelophyllus	0.722102814	1	0	49	0.662377406	0.08714857
Echimys chrysurus	0.722048187	1	0	48	0.664670924	0.092339674
Tragelaphus strepsiceros	0.721865038	1	0	49	0.667842708	0.094852137
Pseudois nayaur	0.72165893	1	0	47	0.642297158	0.080163013
Coendou nycthemera	0.721607408	1	0	48	0.688000882	0.082388644
Calcochloris tytonis	0.720870086	1	0	44	0.602815052	0.084640908
Sus scrofa	0.72064323	1	0	50	0.726386368	0.080142458
Capra caucasica	0.720407678	1	0	47	0.636696037	0.074328426
Hipposideros inexpectatus	0.720395989	1	0	47	0.623530833	0.080521906
Golunda ellioti	0.719853789	1	0	48	0.639602011	0.098553389
Sigmodontomys alfari	0.719783463	1	0	49	0.68416482	0.0816791
Hyosciurus ileile	0.719311356	1	0	48	0.674882888	0.083189217
Naemorhedus baileyi	0.719249553	1	0	50	0.699399768	0.075978807
Macropus agilis	0.71916862	1	0	47	0.635226272	0.098847764
Fossa fossana	0.719152077	1	0	50	0.741816342	0.078373213
Martes zibellina	0.718913953	1	0	48	0.629464374	0.097877482
Funisciurus isabella	0.718476038	1	0	50	0.661339695	0.081441965
Kerivoula minuta	0.717746297	1	0	50	0.684847427	0.088529031
Crossarchus alexandri	0.717521583	1	0	49	0.660665561	0.087713717
Microtus montebelli	0.717339714	1	0	35	0.580908396	0.118585016
Vampyressa nymphaea	0.717304889	1	0	48	0.681203723	0.087635519
Bos taurus	0.717160861	1	0	50	0.730722775	0.068951157
Eropeplus canus	0.71707216	1	0	48	0.646319721	0.07361902
Dendrolagus bennettianus	0.717051999	1	0	50	0.664933932	0.077291562
Gazella erlangeri	0.717035712	1	0	50	0.685606214	0.066751378
Callicebus nigrifrons	0.716814303	1	0	49	0.678383078	0.070000774
Volemys musseri	0.716751521	1	0	43	0.574489343	0.076366983
Sundasciurus hippurus	0.716409584	1	0	49	0.718196471	0.0799385
Srilankamys ohiensis	0.716361698	1	0	50	0.671874627	0.081084561
Scaptochirus moschatus	0.716334934	1	0	43	0.586037348	0.079029403
Callithrix geoffroyi	0.716292151	1	0	49	0.685793863	0.074649865
Sigmodontomys aphrastus	0.716215762	1	0	49	0.697984498	0.085484044
Leopoldamys sabanus	0.71612437	1	0	50	0.70608714	0.088118717
Puma yagouaroundi	0.715966827	1	0	49	0.702677666	0.082700043
Nycteris tragata	0.715938179	1	0	49	0.660256575	0.07543609
Sundasciurus mindanensis	0.715724366	1	0	49	0.696601804	0.078617778
Rousettus bidens	0.715632126	1	0	49	0.658604018	0.079696891
Galago demidoff	0.715599255	1	0	50	0.704718064	0.068837895
Canis simensis	0.715312254	1	0	48	0.647069025	0.074410088
Antidorcas marsupialis	0.715207214	1	0	49	0.619326661	0.067413133
Echinosorex gymnura	0.715017511	1	0	49	0.681498005	0.099327576
Saguinus tripartitus	0.71451585	1	0	47	0.659837815	0.088168934
Capra nubiana	0.714333748	1	0	50	0.672197566	0.064265526
Dendrogale melanura	0.714228844	1	0	49	0.672493445	0.081311584
Microcebus sambiranensis	0.714139341	1	0	50	0.668171728	0.07457578
Bassariscus astutus	0.714099072	1	0	47	0.630256395	0.110170081
Abditomys latidens	0.713974097	1	0	49	0.640442262	0.084408049
Hydromys habbema	0.71360509	1	0	49	0.629481949	0.077305903
Callosciurus notatus	0.713542602	1	0	50	0.742644057	0.080274262
Phyllostomus discolor	0.713503547	1	0	44	0.637902597	0.119066754
Carpomys melanurus	0.713221284	1	0	49	0.661818635	0.080595378
Melomys fraterculus	0.713189584	1	0	45	0.621188139	0.092774103
Cephalophus ogilbyi	0.713031307	1	0	50	0.715092091	0.076785363
Crunomys fallax	0.712919067	1	0	49	0.674714227	0.080221555
Hylopetes sipora	0.712809515	1	0	50	0.675080456	0.082431153
Cabassous unicinctus	0.712690668	1	0	48	0.668097455	0.08206576
Nyctophilus heran	0.71261056	1	0	47	0.64267876	0.096635279
Genetta pardina	0.712574224	1	0	49	0.71866263	0.084764338
Myotis hasseltii	0.712246612	1	0	49	0.679927805	0.085885462
Uromys caudimaculatus	0.712233038	1	0	49	0.660034472	0.099526681
Microtus kikuchii	0.71197032	1	0	44	0.58507761	0.094098961
Petinomys fuscocapillus	0.711804532	1	0	50	0.697562498	0.084276732
Pseudochirulus schlegeli	0.711785209	1	0	47	0.638096793	0.09205781
Callithrix aurita	0.711774635	1	0	49	0.673714135	0.079336221
Rhinolophus maclaudi	0.711604195	1	0	47	0.645481375	0.084784063
Galago thomasi	0.711461513	1	0	49	0.681888118	0.071220105
Rattus simalurensis	0.71112841	1	0	49	0.688176976	0.088297676
Sundasciurus lowii	0.710973435	1	0	50	0.715701449	0.087541059
Rhinolophus shameli	0.710855673	1	0	48	0.653604857	0.092776064
Myotis annamiticus	0.710420285	1	0	48	0.63639357	0.091149389
Nyctimene draconilla	0.710375055	1	0	47	0.637272209	0.095984684
Taeromys punicans	0.710317439	1	0	48	0.621257022	0.072839945
Funambulus layardi	0.710079971	1	0	50	0.663536291	0.085792841
Syncerus caffer	0.709799731	1	0	50	0.690731293	0.086575192
Phalanger carmelitae	0.709310544	1	0	50	0.708149655	0.083150111
Cynopterus luzoniensis	0.709254328	1	0	48	0.654415803	0.091955599
Lariscus insignis	0.709180911	1	0	50	0.714432114	0.08070867
Volemys millicens	0.709024553	1	0	39	0.567305189	0.076717892
Apomys insignis	0.708847878	1	0	49	0.671063442	0.09619979
Bunomys prolatus	0.708820605	1	0	47	0.620787926	0.074708909
Pteropus niger	0.708690762	1	0	49	0.652725179	0.075527377
Sciurus spadiceus	0.708456639	1	0	48	0.654628009	0.084833624
Oenomys ornatus	0.708284551	1	0	50	0.668740712	0.087786684
Rhinolophus macrotis	0.708257831	1	0	40	0.605830336	0.140118746
Rhinolophus robinsoni	0.708044155	1	0	50	0.659392831	0.085061345
Anthops ornatus	0.707836494	1	0	46	0.634703746	0.085794179
Saccolaimus mixtus	0.707533862	1	0	45	0.609844829	0.094573721
Rousettus celebensis	0.707466735	1	0	48	0.657880267	0.078864235
Lepus coreanus	0.707276599	1	0	43	0.594120404	0.098924125
Rattus exulans	0.707181968	1	0	49	0.706237709	0.100397742
Petrogale godmani	0.706730099	1	0	45	0.613711508	0.103780599
Oryzomys yunganus	0.706606026	1	0	48	0.650105964	0.086735249
Sundamys maxi	0.706463646	1	0	48	0.649180242	0.078175421
Hypsugo kitcheneri	0.706439662	1	0	49	0.661373122	0.088469439
Microtus fortis	0.706006214	1	0	35	0.57308811	0.116489472
Craseonycteris thonglongyai	0.705870797	1	0	46	0.63640058	0.085076092
Galidictis fasciata	0.705839114	1	0	49	0.655872757	0.069023975
Sturnira mordax	0.705835745	1	0	49	0.6590228	0.0865429
Rattus mollicomulus	0.705493413	1	0	48	0.641745417	0.069721388
Capricornis rubidus	0.705394619	1	0	49	0.666382539	0.069700715
Caluromys lanatus	0.705195554	1	0	48	0.640944194	0.089260089
Isthmomys flavidus	0.705133743	1	0	48	0.679940223	0.084941657
Diceros bicornis	0.704499077	1	0	48	0.667713682	0.094275678
Galago nyasae	0.704230545	1	0	49	0.667999729	0.076721863
Mus crociduroides	0.704150757	1	0	47	0.619114594	0.078426991
Protoxerus aubinnii	0.703870998	1	0	47	0.690431571	0.085918193
Rattus hainaldi	0.703594762	1	0	47	0.641145806	0.073367873
Pecari tajacu	0.703562942	1	0	50	0.716023776	0.075171515
Zalophus californianus	0.703507686	1	0	47	0.640793493	0.100162868
Dendrolagus stellarum	0.703470562	1	0	50	0.676669667	0.077608213
Taphozous hildegardeae	0.703228851	1	0	48	0.644387798	0.070611751
Miniopterus medius	0.703107612	1	0	47	0.650850462	0.092006668
Hemitragus jemlahicus	0.703101754	1	0	48	0.64918226	0.077739581
Exilisciurus exilis	0.703083195	1	0	50	0.676261949	0.090497146
Megaerops kusnotoi	0.703010194	1	0	39	0.586059232	0.09149402
Caryomys eva	0.702863094	1	0	41	0.565200585	0.083995121
Petrogale rothschildi	0.702582155	1	0	43	0.615363796	0.097651021
Poiana richardsonii	0.702143929	1	0	49	0.691499916	0.096428647
Phascolosorex doriae	0.702038953	1	0	47	0.629575297	0.092233799
Oryzomys nitidus	0.701957925	1	0	48	0.656144623	0.093549725
Profelis aurata	0.701860152	1	0	48	0.681608628	0.09075363
Hipposideros papua	0.701844379	1	0	45	0.617200786	0.090579848
Melasmothrix naso	0.701710321	1	0	47	0.615738255	0.074966236
Marmosops invictus	0.701195296	1	0	48	0.652113116	0.087793321
Meriones hurrianae	0.701089821	1	0	48	0.68450213	0.093134391
Paraxerus vexillarius	0.70063997	1	0	49	0.672299227	0.076818828
Feroculus feroculus	0.700421164	1	0	49	0.648582263	0.09689314
Capreolus pygargus	0.70038555	1	0	48	0.64760699	0.082002832
Muntiacus gongshanensis	0.69997073	1	0	46	0.611140067	0.087984706
Mazama gouazoubira	0.699868515	1	0	50	0.667758757	0.060093777
Mus platythrix	0.699443531	1	0	49	0.659367589	0.09882062
Pseudochirulus caroli	0.698916861	1	0	48	0.638422258	0.09810697
Carpomys phaeurus	0.69877216	1	0	49	0.654031055	0.079350057
Nasuella olivacea	0.698639143	1	0	45	0.636890726	0.086155002
Mesocapromys nanus	0.698125796	1	0	48	0.638101995	0.082673038
Kerivoula intermedia	0.697990191	1	0	48	0.660211113	0.093918233
Funisciurus pyrropus	0.697982112	1	0	49	0.665695712	0.081588491
Kerivoula myrella	0.697948351	1	0	47	0.648541296	0.09101274
Rhinolophus malayanus	0.697802477	1	0	48	0.649041342	0.0933027
Petaurista magnificus	0.697656898	1	0	50	0.689443279	0.086810049
Sundasciurus hoogstraali	0.697584558	1	0	50	0.669266489	0.065966755
Crocidura wimmeri	0.697381195	1	0	47	0.624282033	0.081190385
Phalanger intercastellanus	0.6969661	1	0	48	0.673028082	0.101845713
Pentalagus furnessi	0.696900452	1	0	44	0.610071369	0.094959961
Catopuma temminckii	0.696866692	1	0	48	0.672716632	0.089200497
Cheirogaleus major	0.696522701	1	0	50	0.711807313	0.066957697
Microcebus myoxinus	0.696182582	1	0	50	0.686190189	0.076025518
Coendou prehensilis	0.696127947	1	0	50	0.710838629	0.062726089
Naemorhedus goral	0.696021377	1	0	48	0.668994851	0.081913962
Mustela lutreola	0.695921264	1	0	33	0.54923743	0.112760585
Maxomys hellwaldii	0.695782888	1	0	48	0.674351371	0.084341308
Leopardus tigrinus	0.695748061	1	0	47	0.641860228	0.089907628
Hypsugo macrotis	0.695683766	1	0	49	0.66704578	0.087363213
Protoxerus stangeri	0.695470386	1	0	48	0.669668598	0.078663426
Anonymomys mindorensis	0.695150603	1	0	49	0.669528351	0.072391239
Capra ibex	0.69505566	1	0	48	0.623136183	0.080791912
Pteropus samoensis	0.694966872	1	0	47	0.65232885	0.083494808
Maxomys wattsi	0.694882277	1	0	48	0.63205868	0.074137424
Epomophorus grandis	0.694877208	1	0	48	0.634742402	0.08207058
Nyctimene minutus	0.694817622	1	0	41	0.604768743	0.092104409
Poiana leightoni	0.69475178	1	0	48	0.673865986	0.089694772
Cavia porcellus	0.694696579	1	0	45	0.602584824	0.07642811
Sciurus yucatanensis	0.694521693	1	0	49	0.68884466	0.084844741
Hylomys suillus	0.694366896	1	0	50	0.674532381	0.096591306
Dama dama	0.694352565	1	0	47	0.646072188	0.080932028
Mustela itatsi	0.69434149	1	0	44	0.599780984	0.083858629
Callicebus personatus	0.69393507	1	0	49	0.687761913	0.074571862
Leopoldamys milleti	0.693654821	1	0	46	0.609717012	0.085640552
Oligoryzomys vegetus	0.693522009	1	0	48	0.639141256	0.089899114
Myodes smithii	0.693488043	1	0	35	0.56713821	0.118698648
Phalanger sericeus	0.693336453	1	0	50	0.697921097	0.083206433
Pithecheir melanurus	0.693043905	1	0	46	0.622208091	0.084585188
Ratufa bicolor	0.692983667	1	0	50	0.730471666	0.090434125
Anathana ellioti	0.69295109	1	0	48	0.648257796	0.095043553
Maxomys musschenbroekii	0.692804493	1	0	48	0.66838524	0.082192551
Crocidura jenkinsi	0.692497483	1	0	49	0.669240463	0.094704631
Cheirogaleus minusculus	0.692303491	1	0	46	0.614855133	0.079541522
Hypsugo lophurus	0.691491156	1	0	49	0.65865062	0.087981261
Ovis aries	0.691448428	1	0	50	0.645652859	0.056246321
Microsciurus alfari	0.690926568	1	0	48	0.667325878	0.083698424
Komodomys rintjanus	0.690926375	1	0	49	0.656908688	0.072994811
Callosciurus baluensis	0.69071467	1	0	50	0.707131239	0.071273517
Propithecus verreauxi	0.690632851	1	0	47	0.653715405	0.082289763
Urogale everetti	0.690233582	1	0	49	0.679274072	0.090944302
Miniopterus pusillus	0.68990218	1	0	43	0.623017397	0.103465348
Aethalops alecto	0.689744971	1	0	49	0.649759529	0.088559493
Hyaena brunnea	0.689301697	1	0	43	0.630742428	0.094867682
Grammomys caniceps	0.68906331	1	0	49	0.653551875	0.082334352
Notomys aquilo	0.688930758	1	0	42	0.593433755	0.098147574
Eothenomys proditor	0.688625675	1	0	39	0.557448641	0.073366689
Philetor brachypterus	0.688554124	1	0	43	0.611745879	0.10382817
Euroscaptor longirostris	0.688354968	1	0	39	0.56792432	0.085030567
Funambulus sublineatus	0.688183777	1	0	48	0.646287275	0.080239534
Myotis dominicensis	0.68749593	1	0	45	0.604999594	0.098372316
Rattus burrus	0.687480064	1	0	50	0.680075239	0.085492899
Apodemus peninsulae	0.687455334	1	0	39	0.58656868	0.112281589
Phalanger vestitus	0.687292211	1	0	50	0.685735275	0.087224762
Ctenomys minutus	0.687220161	1	0	44	0.589853999	0.077387937
Bdeogale nigripes	0.686926554	1	0	48	0.682465631	0.080001467
Hypsignathus monstrosus	0.68662089	1	0	49	0.671812749	0.073229154
Prosciurillus leucomus	0.686518771	1	0	48	0.644872687	0.086085596
Procapra picticaudata	0.68631019	1	0	46	0.592346277	0.068375869
Phylloderma stenops	0.686159424	1	0	48	0.671132283	0.093601213
Microsciurus mimulus	0.685934592	1	0	48	0.661153843	0.088222737
Myotis gomantongensis	0.685927337	1	0	48	0.651999089	0.091728636
Raphicerus sharpei	0.68539714	1	0	50	0.652100241	0.071755605
Cephalophus nigrifrons	0.685168648	1	0	49	0.693867682	0.07847594
Arvicola amphibius	0.684933151	1	0	42	0.605446639	0.104558282
Tapirus pinchaque	0.684905342	1	0	49	0.671866737	0.077073307
Xeromys myoides	0.684148295	1	0	42	0.583874335	0.091944364
Chlorocebus pygerythrus	0.683895369	1	0	49	0.682208016	0.075176059
Peroryctes broadbenti	0.683772832	1	0	49	0.650013759	0.093313478
Gerbillus acticola	0.683549932	1	0	44	0.598024504	0.082813639
Peroryctes raffrayana	0.68328864	1	0	48	0.640919674	0.096600057
Ochotona nigritia	0.683234837	1	0	39	0.581511984	0.080431794
Ondatra zibethicus	0.683065822	1	0	40	0.598764957	0.104195135
Sminthopsis archeri	0.682345595	1	0	40	0.567211287	0.110561587
Sylvilagus audubonii	0.682042088	1	0	39	0.597006796	0.106649178
Mus vulcani	0.681966688	1	0	43	0.611574571	0.103008422
Mellivora capensis	0.681540556	1	0	47	0.645115517	0.097268029
Euroscaptor grandis	0.681317369	1	0	36	0.559374589	0.083628004
Catopuma badia	0.681151077	1	0	50	0.667019231	0.076175453
Rattus tawitawiensis	0.681131505	1	0	49	0.663432614	0.087518834
Atherurus africanus	0.681069773	1	0	49	0.683928066	0.080843496
Micromys minutus	0.680380953	1	0	37	0.59815088	0.117941976
Mesomys hispidus	0.680293804	1	0	48	0.639219563	0.087293468
Ovis dalli	0.680187621	1	0	46	0.604993106	0.086006256
Prionailurus viverrinus	0.680147954	1	0	50	0.696883222	0.099110833
Kobus vardonii	0.680141786	1	0	50	0.639425284	0.063553945
Spilocuscus papuensis	0.679950267	1	0	47	0.634286599	0.097047584
Prosciurillus murinus	0.679791241	1	0	47	0.639869464	0.07891954
Myoictis wallacii	0.679707635	1	0	48	0.639952756	0.0981362
Suncus zeylanicus	0.679459495	1	0	45	0.644719974	0.108075425
Hydromys shawmayeri	0.679430362	1	0	47	0.606092691	0.088597842
Crocidura andamanensis	0.679340954	1	0	48	0.656055804	0.08547936
Viverricula indica	0.679134473	1	0	50	0.682470265	0.093858336
Proedromys bedfordi	0.679105474	1	0	43	0.57949872	0.071962534
Mysateles garridoi	0.679038045	1	0	46	0.658815156	0.089992381
Tylomys tumbalensis	0.679035218	1	0	48	0.616431953	0.086263449
Cratogeomys neglectus	0.679026413	1	0	39	0.580544279	0.084678257
Suncus montanus	0.678317361	1	0	46	0.633302792	0.100010431
Raphicerus campestris	0.678218137	1	0	47	0.641630975	0.083156912
Dorcopsulus macleayi	0.678164974	1	0	49	0.652199819	0.085052618
Papio ursinus	0.677989281	1	0	47	0.671157036	0.0788237
Alouatta caraya	0.677860629	1	0	49	0.667303952	0.06748651
Petaurista nobilis	0.677789404	1	0	50	0.6779611	0.086898532
Glyphotes simus	0.67759533	1	0	49	0.64302222	0.076018998
Rhinolophus formosae	0.677328573	1	0	42	0.56164285	0.087158106
Petaurista leucogenys	0.677211095	1	0	45	0.618390495	0.103161978
Rattus leucopus	0.677167229	1	0	49	0.662503762	0.095930541
Lynx pardinus	0.676729185	1	0	43	0.617289108	0.142596643
Dasyurus spartacus	0.67642768	1	0	44	0.608884641	0.10239726
Cheirogaleus crossleyi	0.676316588	1	0	50	0.660965092	0.074198618
Lepilemur leucopus	0.67586205	1	0	47	0.631529772	0.078934306
Lenothrix canus	0.675674001	1	0	50	0.674852566	0.088830093
Cheiromeles parvidens	0.67563571	1	0	47	0.628147066	0.097384569
Euroscaptor parvidens	0.675457158	1	0	45	0.589821246	0.074261391
Tupaia picta	0.675426241	1	0	49	0.664047557	0.084446421
Notoryctes typhlops	0.674989039	1	0	25	0.494072633	0.105686341
Alouatta guariba	0.674890943	1	0	48	0.658126558	0.07558684
Apomys hylocetes	0.674849672	1	0	47	0.630335913	0.094396034
Harpiocephalus harpia	0.674778331	1	0	39	0.583709905	0.097065119
Dobsonia minor	0.674452847	1	0	48	0.617333252	0.085776456
Phalanger matanim	0.674442404	1	0	48	0.639811875	0.087734361
Conepatus semistriatus	0.674369651	1	0	50	0.701809296	0.08279707
Chrotogale owstoni	0.674323532	1	0	49	0.640818083	0.095971584
Pseudochirulus forbesi	0.673996626	1	0	49	0.655926375	0.090121805
Sorex shinto	0.673452932	1	0	31	0.541827131	0.126280285
Chiropodomys pusillus	0.673296966	1	0	44	0.620296928	0.10328848
Hipposideros galeritus	0.672434608	1	0	48	0.641906053	0.087910075
Ptilocercus lowii	0.672147917	1	0	49	0.645535275	0.095859603
Coendou bicolor	0.671893678	1	0	48	0.662478528	0.071413102
Pteropus gilliardorum	0.671858669	1	0	48	0.616669447	0.081611957
Maxomys bartelsii	0.671530296	1	0	47	0.624485105	0.078015888
Taphozous kapalgensis	0.671385927	1	0	39	0.568416036	0.099029977
Tupaia belangeri	0.671035583	1	0	49	0.678250653	0.092450496
Brachyphylla nana	0.670973336	1	0	50	0.661528084	0.072958192
Thallomys paedulcus	0.670855538	1	0	44	0.62023132	0.093810064
Proechimys canicollis	0.66992718	1	0	48	0.639573178	0.081960022
Isthmomys pirrensis	0.669630795	1	0	48	0.65428187	0.093721075
Lophostoma evotis	0.669538357	1	0	47	0.647435381	0.087330152
Hyperacrius wynnei	0.66933683	1	0	35	0.551870971	0.095615223
Pseudochirops corinnae	0.669256013	1	0	49	0.670094934	0.087206929
Chaerephon johorensis	0.66924146	1	0	49	0.635487531	0.083409175
Mus famulus	0.669057835	1	0	47	0.610820276	0.083481914
Rhipidomys nitela	0.668329805	1	0	47	0.635879377	0.092540884
Scotophilus celebensis	0.668217535	1	0	45	0.613932132	0.090182397
Hystrix indica	0.668094955	1	0	45	0.65413321	0.107040139
Suncus hosei	0.667834767	1	0	46	0.624473071	0.105044319
Saiga tatarica	0.667761808	1	0	46	0.604152408	0.071990851
Hesperoptenus doriae	0.667645594	1	0	44	0.611853569	0.093977329
Rhynchomys soricoides	0.667287245	1	0	46	0.614757229	0.086378301
Tscherskia triton	0.66726552	1	0	34	0.543664259	0.114751315
Bos grunniens	0.667237441	1	0	49	0.629916903	0.072541544
Mesomys stimulax	0.667214607	1	0	47	0.626246913	0.088074803
Felis bieti	0.666848522	1	0	47	0.601940124	0.08165546
Dephomys eburneae	0.66680266	1	0	48	0.645400801	0.088100337
Hipposideros pelingensis	0.666022574	1	0	47	0.618344069	0.080957263
Diplomys labilis	0.665865351	1	0	48	0.690198402	0.094715592
Crunomys celebensis	0.665376314	1	0	48	0.622087534	0.07540621
Apodemus flavicollis	0.665198447	1	0	43	0.61577191	0.103702117
Orthogeomys heterodus	0.665047369	1	0	45	0.620094038	0.080877728
Dorcopsis muelleri	0.664838999	1	0	50	0.640963758	0.078826746
Equus kiang	0.664482228	1	0	47	0.592772218	0.067798043
Microtus guatemalensis	0.664452043	1	0	42	0.592884486	0.084930021
Funambulus palmarum	0.664408765	1	0	48	0.639225929	0.095767583
Eothenomys melanogaster	0.663862518	1	0	37	0.563601589	0.1180555
Lepus habessinicus	0.663840817	1	0	49	0.659170459	0.090055704
Procyon cancrivorus	0.663741688	1	0	44	0.637176176	0.102988379
Murexia longicaudata	0.66364894	1	0	47	0.6093572	0.083422309
Solisorex pearsoni	0.663547655	1	0	45	0.621771177	0.095596199
Acomys ignitus	0.663074243	1	0	48	0.642730856	0.084575748
Diplothrix legata	0.663028934	1	0	42	0.573913292	0.076308712
Funambulus tristriatus	0.662827024	1	0	47	0.648479309	0.090578027
Macropus antilopinus	0.662771536	1	0	42	0.608727621	0.10790933
Habromys chinanteco	0.662755688	1	0	48	0.613813506	0.073279486
Cavia fulgida	0.662565454	1	0	39	0.564088501	0.077190566
Batomys granti	0.662498718	1	0	48	0.623646133	0.091186897
Apomys datae	0.662298895	1	0	44	0.614157023	0.093260283
Romerolagus diazi	0.662056734	1	0	39	0.561509071	0.105340325
Oryzomys saturatior	0.66194073	1	0	49	0.642087678	0.087346995
Callicebus modestus	0.661519857	1	0	46	0.625157234	0.07789409
Callicebus olallae	0.661519857	1	0	46	0.625157234	0.07789409
Rupicapra pyrenaica	0.661407296	1	0	45	0.587486469	0.079193556
Pseudochirops coronatus	0.661403812	1	0	45	0.625701126	0.097887193
Rhinolophus philippinensis	0.661402543	1	0	43	0.609554177	0.093975453
Sundasciurus tenuis	0.66139583	1	0	50	0.68307548	0.089071102
Dactylomys dactylinus	0.661389186	1	0	48	0.628859045	0.091609225
Chiroderma improvisum	0.661276838	1	0	43	0.591575364	0.08095176
Rhynchocyon chrysopygus	0.660931203	1	0	46	0.628889474	0.087255572
Ratufa macroura	0.660864361	1	0	49	0.691451629	0.092646447
Bassaricyon gabbii	0.660744115	1	0	49	0.659899477	0.080818534
Bassaricyon alleni	0.660698069	1	0	46	0.623292121	0.085337515
Microtus oaxacensis	0.660664186	1	0	39	0.575102965	0.092757888
Diomys crumpi	0.660457426	1	0	46	0.639242899	0.089719693
Hipposideros durgadasi	0.660375211	1	0	46	0.605345863	0.088932703
Phoniscus atrox	0.660221046	1	0	48	0.652819052	0.087299065
Tokudaia osimensis	0.660158186	1	0	39	0.569714674	0.077402438
Kerivoula hardwickii	0.659624494	1	0	38	0.595739763	0.11221202
Pseudochirops cupreus	0.659006122	1	0	49	0.661571452	0.084651407
Prosciurillus weberi	0.658906743	1	0	47	0.600519477	0.069476707
Oryzomys laticeps	0.658594878	1	0	48	0.638742408	0.085250387
Praomys mutoni	0.658460147	1	0	45	0.615713648	0.097393871
Hipposideros lankadiva	0.658442351	1	0	46	0.605193187	0.080690126
Microtus mongolicus	0.65832481	1	0	34	0.546056235	0.111139871
Acerodon humilis	0.657814706	1	0	47	0.61016002	0.076962492
Nandinia binotata	0.657798367	1	0	49	0.704970267	0.098052869
Monodelphis emiliae	0.657182316	1	0	45	0.599208585	0.094422978
Galidia elegans	0.657167999	1	0	49	0.702615474	0.087244812
Phyllostomus latifolius	0.657119397	1	0	47	0.626496761	0.093801888
Murina aenea	0.65703178	1	0	48	0.647643518	0.091683208
Lynx lynx	0.656859096	1	0	36	0.574668794	0.123045353
Nyctimene aello	0.65685719	1	0	48	0.606829695	0.081766428
Eidolon dupreanum	0.656856475	1	0	49	0.649316042	0.067220453
Rattus praetor	0.656702282	1	0	50	0.657916714	0.094553454
Hippotragus equinus	0.656697288	1	0	48	0.639418928	0.088976103
Mus fernandoni	0.656523466	1	0	46	0.606655116	0.081780017
Artibeus cinereus	0.656420451	1	0	47	0.637826536	0.094275556
Glischropus javanus	0.656409126	1	0	38	0.581692529	0.096569381
Rhinolophus sedulus	0.656392538	1	0	45	0.62916286	0.089915862
Margaretamys elegans	0.656080942	1	0	47	0.615806954	0.079932005
Rhizomys sinensis	0.65594213	1	0	40	0.562316692	0.103077073
Pudu mephistophiles	0.655727749	1	0	49	0.634976805	0.066683793
Phyllonycteris aphylla	0.655205729	1	0	44	0.596802612	0.083087615
Hipposideros edwardshilli	0.655114263	1	0	44	0.594469882	0.09355535
Millardia kondana	0.654846803	1	0	48	0.628140604	0.088179812
Rhinolophus mitratus	0.654770967	1	0	41	0.582219901	0.081264469
Moschus moschiferus	0.654658982	1	0	45	0.617818507	0.091487552
Castor canadensis	0.654561026	1	0	39	0.570181111	0.089691726
Peromyscus yucatanicus	0.654556528	1	0	49	0.666079256	0.084787509
Microtus agrestis	0.654012191	1	0	38	0.57932537	0.106733085
Hipposideros ater	0.653710145	1	0	36	0.564302283	0.098355215
Mogera tokudae	0.653633715	1	0	35	0.544654465	0.088298082
Potamochoerus porcus	0.65351203	1	0	49	0.69896375	0.07532011
Praomys morio	0.653072471	1	0	48	0.656549744	0.100440577
Leptomys signatus	0.652965111	1	0	39	0.573412132	0.105499945
Crocidura tenuis	0.652726458	1	0	46	0.617547858	0.089641
Vulpes zerda	0.652581205	1	0	45	0.640551333	0.12284473
Capra sibirica	0.652341748	1	0	45	0.622287913	0.082652223
Murina suilla	0.65215005	1	0	47	0.623797546	0.093658415
Tragelaphus spekii	0.652051318	1	0	50	0.644469708	0.064261913
Rhinolophus shortridgei	0.651700077	1	0	47	0.614556942	0.094690455
Myrmecophaga tridactyla	0.651457526	1	0	48	0.615463705	0.08459065
Uromys anak	0.651262526	1	0	48	0.632012232	0.099985201
Otonyctomys hatti	0.65121999	1	0	49	0.652795925	0.080553783
Rhinolophus maendeleo	0.65115108	1	0	44	0.597895531	0.085371026
Hipposideros larvatus	0.651056031	1	0	36	0.575601542	0.103563537
Leontopithecus caissara	0.650443865	1	0	42	0.571656534	0.095745465
Caryomys inez	0.650226505	1	0	31	0.531936136	0.083680152
Myosciurus pumilio	0.650206688	1	0	45	0.605506218	0.084156142
Cephalophus silvicultor	0.650179539	1	0	49	0.654582979	0.076930986
Hoplomys gymnurus	0.649866076	1	0	49	0.664822584	0.096580963
Notopteris macdonaldi	0.649835035	1	0	45	0.612502483	0.084238474
Lichonycteris obscura	0.649715523	1	0	47	0.640846684	0.097229928
Aepyceros melampus	0.649693244	1	0	47	0.626922093	0.090624711
Myosorex geata	0.649645576	1	0	42	0.588658339	0.087679042
Nesoromys ceramicus	0.64948387	1	0	44	0.59479914	0.081509202
Meriones tristrami	0.649278853	1	0	44	0.600271533	0.08528148
Bunomys fratrorum	0.64913289	1	0	47	0.606656309	0.072334844
Chimarrogale sumatrana	0.648695644	1	0	42	0.594025171	0.09101312
Heteromys anomalus	0.648575915	1	0	49	0.649530728	0.091657101
Rhinolophus trifoliatus	0.648477623	1	0	49	0.624091049	0.079699311
Sciurotamias davidianus	0.648353354	1	0	42	0.590094294	0.090068822
Paraxerus flavovittis	0.647788456	1	0	48	0.626917616	0.073850138
Rhinolophus arcuatus	0.647546013	1	0	38	0.595089687	0.100759946
Pelomys isseli	0.647495604	1	0	42	0.597162898	0.082326471
Meriones arimalius	0.647202788	1	0	41	0.575450232	0.080449058
Rhinolophus creaghi	0.647188453	1	0	47	0.620348821	0.082359774
Phodopus roborovskii	0.646946118	1	0	34	0.553830342	0.114907729
Hyomys dammermani	0.646907788	1	0	49	0.628936664	0.093636063
Felis catus	0.646855108	1	0	45	0.616272227	0.086460174
Natalus jamaicensis	0.64643409	1	0	40	0.572365759	0.089954695
Latidens salimalii	0.646417513	1	0	45	0.602359768	0.083705013
Melomys rufescens	0.646067406	1	0	45	0.620198891	0.110269568
Artibeus amplus	0.645927897	1	0	47	0.609278806	0.092839299
Apodemus sylvaticus	0.645637291	1	0	42	0.610034252	0.110974994
Cratogeomys merriami	0.645473257	1	0	32	0.542482635	0.108777727
Dendrolagus matschiei	0.645029191	1	0	47	0.663148046	0.09609205
Heteromys australis	0.645020033	1	0	47	0.638800425	0.097591673
Abeomelomys sevia	0.644936967	1	0	43	0.595028248	0.08575659
Taeromys taerae	0.644758988	1	0	41	0.600186323	0.105867678
Marmosops noctivagus	0.644511595	1	0	42	0.583456762	0.099360216
Gerbillus andersoni	0.644488474	1	0	37	0.565148614	0.102414906
Margaretamys parvus	0.644226683	1	0	45	0.600590955	0.086001495
Deomys ferrugineus	0.643965291	1	0	44	0.594012569	0.081627212
Cercartetus caudatus	0.643638107	1	0	48	0.634583035	0.101343832
Maxomys hylomyoides	0.64343598	1	0	47	0.624085359	0.086698404
Paranyctimene raptor	0.643206116	1	0	37	0.584042478	0.100833579
Hipposideros hypophyllus	0.643149726	1	0	42	0.590847172	0.088061031
Protochromys fellowsi	0.642984036	1	0	40	0.594975821	0.111233712
Sorex cansulus	0.642734704	1	0	29	0.517882613	0.102799817
Chrotomys silaceus	0.642505035	1	0	45	0.610101759	0.08943212
Eothenomys custos	0.642405304	1	0	37	0.549032134	0.08225196
Suncus ater	0.642379366	1	0	41	0.591655709	0.089811172
Ochotona iliensis	0.642186985	1	0	35	0.548450133	0.08852913
Otomys burtoni	0.642170709	1	0	46	0.610691122	0.096872395
Tateomys macrocercus	0.641885905	1	0	38	0.574887747	0.084876541
Saccopteryx canescens	0.641647034	1	0	44	0.594137414	0.090128333
Phalanger mimicus	0.64132204	1	0	43	0.605073096	0.105272411
Equus burchellii	0.641258865	1	0	44	0.626374076	0.100568581
Funisciurus carruthersi	0.640967206	1	0	45	0.611632903	0.070987783
Hystrix cristata	0.640799186	1	0	46	0.664388708	0.109041171
Crocidura nigripes	0.640213257	1	0	41	0.59383702	0.092265422
Praomys minor	0.63970089	1	0	46	0.617740495	0.094627266
Eonycteris major	0.639677644	1	0	47	0.61452747	0.080668729
Reithrodontomys darienensis	0.63949103	1	0	47	0.620602164	0.092045375
Genetta abyssinica	0.63944355	1	0	49	0.65789879	0.088897792
Sundasciurus moellendorffi	0.639355642	1	0	48	0.63987883	0.071580372
Hipposideros wollastoni	0.638946003	1	0	41	0.584129588	0.102544185
Distoechurus pennatus	0.638866786	1	0	48	0.624557874	0.100485932
Otolemur crassicaudatus	0.638447934	1	0	45	0.607630427	0.084013374
Stenoderma rufum	0.638242405	1	0	40	0.577478046	0.091376813
Pseudois schaeferi	0.637717784	1	0	45	0.59041857	0.070929871
Paulamys naso	0.637615499	1	0	45	0.589285033	0.066893287
Rattus timorensis	0.637547865	1	0	47	0.605089859	0.073759882
Emballonura raffrayana	0.637422517	1	0	45	0.594911554	0.095155448
Millardia kathleenae	0.637091316	1	0	46	0.620019629	0.086128041
Taeromys arcuatus	0.636918252	1	0	45	0.597917669	0.083852376
Ariteus flavescens	0.636580502	1	0	40	0.552234235	0.085904223
Dactylopsila palpator	0.636577698	1	0	49	0.640744849	0.090013379
Lampronycteris brachyotis	0.636501022	1	0	47	0.627884821	0.09141428
Dipodillus somalicus	0.636441206	1	0	44	0.596210013	0.081448511
Phenacomys intermedius	0.636206932	1	0	37	0.596743591	0.114197665
Crocidura hispida	0.636040807	1	0	47	0.632757129	0.087063987
Dactylopsila trivirgata	0.635517177	1	0	48	0.622044194	0.083677858
Sorex cylindricauda	0.634999813	1	0	30	0.531833551	0.111001642
Cremnomys elvira	0.63482314	1	0	47	0.619609231	0.081957379
Triaenops auritus	0.634725075	1	0	43	0.591918003	0.079942472
Callosciurus inornatus	0.634542646	1	0	48	0.640911227	0.079232742
Ochotona thomasi	0.634446039	1	0	28	0.513214388	0.070140368
Pectinator spekei	0.633924352	1	0	46	0.633688751	0.089206866
Galerella ochracea	0.633881066	1	0	46	0.614100045	0.082008509
Isothrix pagurus	0.633874311	1	0	44	0.583711398	0.085772452
Lonchothrix emiliae	0.633813616	1	0	45	0.597841449	0.092653959
Gerbillus dunni	0.63364865	1	0	40	0.581707691	0.087299859
Connochaetes gnou	0.633443255	1	0	42	0.584050101	0.100069313
Oryzomys rhabdops	0.633299179	1	0	47	0.621642897	0.091320025
Scotinomys teguina	0.633085051	1	0	46	0.641963911	0.102563402
Myonycteris brachycephala	0.632987999	1	0	45	0.607491737	0.082145922
Rhinolophus convexus	0.632977394	1	0	42	0.591022949	0.089831684
Epomophorus gambianus	0.63292283	1	0	48	0.638677377	0.087044828
Hipposideros pratti	0.632738608	1	0	31	0.530061413	0.094137411
Nyctimene albiventer	0.632683835	1	0	47	0.613800986	0.094631744
Makalata rhipidura	0.632443966	1	0	44	0.582863776	0.090571052
Rhinolophus cognatus	0.632405629	1	0	46	0.61858764	0.084927229
Paramelomys levipes	0.632300312	1	0	44	0.615920025	0.096809887
Microgale dryas	0.63225402	1	0	40	0.580449851	0.075542862
Genetta cristata	0.632216825	1	0	48	0.669727843	0.102483398
Rhinolophus pearsonii	0.631984411	1	0	32	0.552703243	0.131974109
Acomys louisae	0.631969161	1	0	41	0.579687836	0.07749438
Crocidura lea	0.631883155	1	0	42	0.60216795	0.093855651
Ochotona dauurica	0.631821524	1	0	34	0.555524915	0.098503297
Pteronura brasiliensis	0.63160442	1	0	46	0.62786668	0.096752921
Funisciurus congicus	0.631525185	1	0	41	0.60186191	0.102706436
Vampyressa brocki	0.631425081	1	0	44	0.584160699	0.097475807
Xerus erythropus	0.631278628	1	0	47	0.637668004	0.090273861
Steatomys jacksoni	0.631134058	1	0	43	0.594358332	0.087461327
Dremomys pernyi	0.630913767	1	0	40	0.574196179	0.087063682
Heliosciurus rufobrachium	0.63082313	1	0	44	0.616154108	0.103788505
Hybomys planifrons	0.630684337	1	0	46	0.608266792	0.098064847
Microcebus griseorufus	0.630492116	1	0	48	0.64435716	0.076361508
Gerbillus gerbillus	0.630242911	1	0	35	0.55809835	0.092974605
Niviventer confucianus	0.630102176	1	0	38	0.561557755	0.098038364
Petrogale burbidgei	0.629988853	1	0	35	0.541165974	0.086112109
Taeromys hamatus	0.62976467	1	0	45	0.5852761	0.078928225
Maxomys baeodon	0.629301383	1	0	48	0.647065234	0.086540834
Orthogeomys hispidus	0.628950929	1	0	50	0.636550139	0.084535816
Genetta piscivora	0.62875515	1	0	48	0.623482628	0.082969073
Myotis ricketti	0.628716	1	0	35	0.539232003	0.095217344
Hypsugo imbricatus	0.628499412	1	0	37	0.580807679	0.106343612
Melomys rubicola	0.628453668	1	0	45	0.597313947	0.09091988
Przewalskium albirostris	0.628427255	1	0	43	0.585197658	0.071466407
Muntiacus putaoensis	0.628131117	1	0	47	0.588187096	0.08300439
Cremnomys cutchicus	0.628074471	1	0	48	0.640255863	0.087338899
Mylomys dybowskii	0.627851505	1	0	44	0.592253332	0.082636002
Sylvilagus graysoni	0.627793889	1	0	41	0.549811972	0.067925073
Ichthyomys tweedii	0.627519874	1	0	44	0.608471438	0.08619373
Tylomys bullaris	0.627371313	1	0	41	0.577272629	0.081844513
Eothenomys chinensis	0.627283106	1	0	30	0.519192141	0.067152143
Aproteles bulmerae	0.627030728	1	0	43	0.588634512	0.08320516
Mosia nigrescens	0.626920884	1	0	39	0.588120352	0.102707893
Microtus maximowiczii	0.626725005	1	0	26	0.51789863	0.110609268
Hipposideros cervinus	0.626720544	1	0	44	0.585819139	0.086976956
Anomalurus pusillus	0.626630979	1	0	47	0.646195984	0.093177315
Myodes rex	0.626547108	1	0	34	0.556658822	0.109529582
Peromyscus gymnotis	0.626005255	1	0	48	0.660555472	0.085487589
Uropsilus andersoni	0.62592087	1	0	24	0.499899083	0.090587756
Ochotona argentata	0.625467055	1	0	26	0.510746914	0.078905275
Petropseudes dahli	0.625454342	1	0	37	0.586737779	0.108559805
Alticola montosa	0.625207367	1	0	34	0.541253653	0.094288826
Orthogeomys underwoodi	0.62515621	1	0	45	0.601861942	0.078605632
Petaurista petaurista	0.625046316	1	0	48	0.689953752	0.105922771
Reithrodontomys creper	0.624968945	1	0	41	0.602513345	0.091615779
Dendroprionomys rousseloti	0.624557376	1	0	43	0.585437864	0.08296465
Glossophaga longirostris	0.624285467	1	0	47	0.609384481	0.081822821
Lepus europaeus	0.624265687	1	0	46	0.637262351	0.106653903
Dasyprocta punctata	0.624111935	1	0	48	0.627789942	0.072815747
Hylopetes winstoni	0.623818031	1	0	46	0.623364819	0.082453015
Phyllostomus elongatus	0.623816344	1	0	47	0.627745268	0.089861566
Microcebus murinus	0.623661667	1	0	48	0.660122845	0.072406509
Pseudomys glaucus	0.623505084	1	0	35	0.558175022	0.103972
Petaurista xanthotis	0.623486313	1	0	43	0.603829129	0.093394931
Pantholops hodgsonii	0.623380326	1	0	42	0.55865854	0.062490381
Pudu puda	0.622996726	1	0	30	0.531146717	0.112878855
Proechimys trinitatus	0.622723449	1	0	45	0.59982504	0.089952638
Cheirogaleus sibreei	0.622240559	1	0	45	0.601857564	0.079536767
Pogonomelomys mayeri	0.621863982	1	0	48	0.602816973	0.091129567
Emballonura dianae	0.621447686	1	0	40	0.562576343	0.086243214
Isoodon auratus	0.621361047	1	0	27	0.521637775	0.112622171
Otomys dartmouthi	0.621230124	1	0	43	0.580217335	0.079713707
Bdeogale jacksoni	0.621192324	1	0	47	0.617009969	0.073073534
Caprolagus hispidus	0.62107089	1	0	43	0.626686582	0.113295222
Speothos venaticus	0.620997863	1	0	46	0.634710182	0.089396585
Vulpes bengalensis	0.620931478	1	0	45	0.636960243	0.103552796
Rheomys mexicanus	0.620790701	1	0	31	0.522433161	0.0900623
Bassariscus sumichrasti	0.620493375	1	0	46	0.657139578	0.094157616
Capra hircus	0.620366895	1	0	41	0.581571442	0.08897791
Microtus quasiater	0.620303585	1	0	34	0.548651252	0.096179635
Petrogale mareeba	0.619634233	1	0	32	0.542911011	0.085912712
Canis latrans	0.619355399	1	0	45	0.620288744	0.101505201
Rhinolophus imaizumii	0.61906687	1	0	29	0.52741762	0.106068558
Vicugna vicugna	0.618903777	1	0	41	0.574151688	0.106302257
Chiruromys lamia	0.618732381	1	0	38	0.57561188	0.10500978
Parahydromys asper	0.61858209	1	0	48	0.61327937	0.091231537
Hesperoptenus gaskelli	0.618396704	1	0	38	0.567303623	0.092101705
Orthogeomys cuniculus	0.618316857	1	0	44	0.594591769	0.083596955
Manis tricuspis	0.618293283	1	0	47	0.645243263	0.083145306
Scotinomys xerampelinus	0.617956066	1	0	44	0.604513862	0.089111486
Macropus parryi	0.617885976	1	0	42	0.583658142	0.084069266
Centronycteris centralis	0.617820978	1	0	44	0.587748841	0.082190255
Tupaia moellendorffi	0.617537881	1	0	49	0.65035153	0.078270672
Mesembriomys macrurus	0.617521602	1	0	31	0.535414011	0.103157411
Chalinolobus nigrogriseus	0.61747499	1	0	23	0.504294908	0.118304165
Gerbillus muriculus	0.617169358	1	0	31	0.518606608	0.0777889
Lemmus lemmus	0.617048161	1	0	34	0.53274544	0.109218817
Peromyscus truei	0.616874672	1	0	40	0.585820507	0.11934914
Melomys dollmani	0.616602454	1	0	39	0.567461077	0.102299194
Cratogeomys tylorhinus	0.616588596	1	0	28	0.515465358	0.099959067
Sciurus flammifer	0.616203568	1	0	48	0.624180205	0.081814858
Gazella cuvieri	0.615939571	1	0	40	0.569043027	0.086832419
Rhinolophus celebensis	0.615919916	1	0	35	0.547826718	0.105878386
Rattus korinchi	0.615900408	1	0	45	0.597310408	0.079450809
Suncus malayanus	0.615601761	1	0	44	0.61255827	0.111106915
Gerbillus famulus	0.61549345	1	0	39	0.575582485	0.089320889
Mogera insularis	0.615344736	1	0	34	0.540853826	0.078732442
Cephalophus weynsi	0.615294186	1	0	49	0.639593031	0.072829031
Microcebus rufus	0.615086941	1	0	48	0.636823091	0.07120773
Ardops nichollsi	0.615077929	1	0	35	0.558184229	0.08765305
Brachyuromys betsileoensis	0.61496285	1	0	48	0.606587871	0.068865384
Chilonatalus micropus	0.614894646	1	0	40	0.567139728	0.084701691
Ourebia ourebi	0.614774038	1	0	48	0.6038103	0.08081932
Anomalurus beecrofti	0.614446731	1	0	45	0.626570327	0.094298888
Gerbillus nancillus	0.614402173	1	0	39	0.567667442	0.082330038
Crocidura elongata	0.614378232	1	0	40	0.573553616	0.094169301
Tragelaphus angasii	0.614083372	1	0	40	0.593306611	0.082109371
Crocidura rhoditis	0.613985739	1	0	40	0.582513866	0.093405853
Petaurus gracilis	0.61390887	1	0	42	0.599868939	0.090553449
Tragelaphus scriptus	0.613838895	1	0	47	0.602799924	0.074623645
Scotorepens sanborni	0.61364614	1	0	29	0.527977705	0.124599372
Marmosa xerophila	0.613604513	1	0	47	0.629302518	0.08351172
Dasyurus albopunctatus	0.613349424	1	0	43	0.577393647	0.077784493
Bos frontalis	0.613240022	1	0	48	0.671590411	0.08616487
Rhinolophus rouxii	0.612886397	1	0	37	0.577891349	0.091023607
Tamandua mexicana	0.612846332	1	0	43	0.604152538	0.090120086
Taphozous hamiltoni	0.612546158	1	0	35	0.542937647	0.080492073
Proechimys poliopus	0.612251671	1	0	49	0.621620553	0.088141342
Niviventer langbianis	0.612128605	1	0	49	0.642534689	0.085278182
Lagidium peruanum	0.612117679	1	0	41	0.55751531	0.107139752
Dasymys rufulus	0.611976085	1	0	48	0.622859925	0.088040139
Alticola argentatus	0.611759815	1	0	35	0.535208051	0.098009198
Pteropus macrotis	0.611724535	1	0	46	0.59759886	0.086779785
Melanomys caliginosus	0.611693049	1	0	44	0.601393987	0.085504054
Olallamys edax	0.611618826	1	0	42	0.568074296	0.080023207
Gerbillus gleadowi	0.61145419	1	0	40	0.573067249	0.098022164
Otocyon megalotis	0.610880643	1	0	30	0.53914085	0.108409285
Rhinolophus marshalli	0.610673571	1	0	42	0.582074265	0.091092605
Nyctimene cephalotes	0.610597908	1	0	43	0.578923221	0.088193155
Cannomys badius	0.610303358	1	0	38	0.565589787	0.104933132
Tokudaia muenninki	0.610293497	1	0	33	0.544614688	0.072324354
Coelops frithii	0.609806662	1	0	33	0.544944086	0.104727551
Sciurus lis	0.609638941	1	0	38	0.571899268	0.09698164
Miniopterus fuscus	0.609507487	1	0	26	0.489466368	0.111638884
Connochaetes taurinus	0.609358394	1	0	44	0.589827057	0.10225652
Chiropodomys muroides	0.609188914	1	0	46	0.615204119	0.085612236
Mustela nivalis	0.609035601	1	0	14	0.474091558	0.095606238
Eptesicus guadeloupensis	0.6089949	1	0	38	0.557991945	0.085955281
Emballonura beccarii	0.608977422	1	0	37	0.568627248	0.095103829
Pseudohydromys murinus	0.608870576	1	0	38	0.566799223	0.099562938
Ochotona rufescens	0.608785984	1	0	38	0.559882009	0.102422123
Chaerephon bregullae	0.608455305	1	0	39	0.557511081	0.08916526
Martes martes	0.608191548	1	0	30	0.539304648	0.114181628
Ochotona hoffmanni	0.60774352	1	0	26	0.500260189	0.081440044
Pipistrellus permixtus	0.607202416	1	0	42	0.579279136	0.086389113
Phascolosorex dorsalis	0.607118724	1	0	44	0.589112647	0.086922821
Mus mayori	0.606929293	1	0	40	0.581156858	0.085477709
Hipposideros inornatus	0.60683562	1	0	30	0.526655337	0.097167567
Heliosciurus ruwenzorii	0.606831925	1	0	45	0.612727956	0.079737403
Rousettus spinalatus	0.606696245	1	0	45	0.589665998	0.077391383
Crocidura mindorus	0.606620636	1	0	44	0.592365186	0.0845051
Oryzomys galapagoensis	0.606194985	1	0	38	0.553105988	0.085547638
Cuniculus paca	0.606185762	1	0	50	0.673615704	0.081089509
Praomys lukolelae	0.6061168	1	0	46	0.619755698	0.096005253
Sundasciurus jentinki	0.606078035	1	0	46	0.624430939	0.082093343
Mallomys gunung	0.606010416	1	0	43	0.599703692	0.087228433
Artibeus watsoni	0.605850877	1	0	44	0.613584605	0.084551034
Taphozous troughtoni	0.605657178	1	0	29	0.517232811	0.099242132
Meriones dahli	0.60533318	1	0	33	0.524329683	0.084920245
Proechimys steerei	0.605176449	1	0	42	0.599515661	0.099845865
Erophylla bombifrons	0.605005593	1	0	42	0.584413644	0.09392674
Lepus brachyurus	0.604755384	1	0	33	0.534706854	0.106813656
Hipposideros ridleyi	0.604625394	1	0	38	0.572851528	0.092956564
Lophostoma carrikeri	0.604556631	1	0	37	0.566734884	0.100035363
Maxomys moi	0.60452011	1	0	44	0.616574844	0.086795141
Reithrodontomys spectabilis	0.60449653	1	0	37	0.563457242	0.085052834
Dasymys foxi	0.60435713	1	0	45	0.600230484	0.087529235
Natalus major	0.604241588	1	0	38	0.579135736	0.100405636
Leptomys elegans	0.60414516	1	0	44	0.585528161	0.088379071
Crocidura miya	0.603954908	1	0	43	0.587052103	0.090873164
Cryptomys ochraceocinereus	0.603936861	1	0	40	0.573908406	0.085067268
Rousettus obliviosus	0.60383784	1	0	39	0.563562481	0.075390024
Grammomys buntingi	0.603771183	1	0	46	0.61963074	0.091569949
Pseudochirulus canescens	0.603557268	1	0	47	0.61440148	0.091718896
Apodemus ponticus	0.603512383	1	0	36	0.564621121	0.089204455
Hylopetes phayrei	0.603474718	1	0	46	0.62189158	0.086442478
Pelomys hopkinsi	0.60342243	1	0	30	0.521238511	0.07631602
Rattus andamanensis	0.603331374	1	0	47	0.615443761	0.097007075
Paramelomys platyops	0.603139079	1	0	43	0.601830899	0.108289512
Kobus leche	0.603111669	1	0	44	0.569120056	0.066463307
Oryzomys alfaroi	0.603028431	1	0	45	0.604003474	0.085359184
Dasypus kappleri	0.603012	1	0	46	0.608809143	0.097296642
Calomys hummelincki	0.602830831	1	0	45	0.58898116	0.087256965
Paramelomys mollis	0.602786426	1	0	40	0.593654068	0.107189521
Oryzomys russatus	0.602578856	1	0	40	0.549479402	0.079950405
Petaurista elegans	0.602350907	1	0	49	0.673414005	0.096439429
Apodemus latronum	0.602221962	1	0	35	0.547224864	0.084548275
Lionycteris spurrelli	0.602036161	1	0	47	0.613084381	0.098899963
Mallomys aroaensis	0.602024799	1	0	48	0.625979661	0.08484051
Brachyuromys ramirohitra	0.601805486	1	0	48	0.602932689	0.068832763
Microtus subterraneus	0.601774482	1	0	32	0.542803351	0.108757297
Lepus microtis	0.601384615	1	0	39	0.564428099	0.083419305
Gerbillus rosalinda	0.601041528	1	0	41	0.579382451	0.080069597
Myosorex eisentrauti	0.600348501	1	0	38	0.561819064	0.087712076
Gulo gulo	0.600306804	1	0	44	0.611805738	0.091878401
Neotoma lepida	0.600268908	1	0	35	0.560400763	0.106910764
Murina ryukyuana	0.600051532	1	0	26	0.504436737	0.113707012
Epomops franqueti	0.60004847	1	0	42	0.584558797	0.087029591
Urocyon cinereoargenteus	0.599976875	1	0	40	0.576425273	0.110926707
Crocidura trichura	0.599793654	1	0	39	0.552723292	0.077755225
Glironia venusta	0.599524747	1	0	45	0.597728673	0.091400453
Chinchilla lanigera	0.599260446	1	0	24	0.436579605	0.186611215
Alticola semicanus	0.599226028	1	0	23	0.500104554	0.099709897
Heteromys gaumeri	0.599117815	1	0	46	0.61826041	0.092110609
Acomys dimidiatus	0.598794208	1	0	38	0.569602522	0.081416264
Microtus clarkei	0.598787731	1	0	38	0.548953993	0.076022056
Rhipidomys venustus	0.598597056	1	0	41	0.580356641	0.084467558
Moschus chrysogaster	0.598478366	1	0	46	0.607607326	0.089605107
Myotis yanbarensis	0.598456787	1	0	26	0.509481655	0.11082659
Acomys kempi	0.598332003	1	0	41	0.572646289	0.081315056
Makalata grandis	0.598064066	1	0	42	0.568188135	0.089369287
Funambulus pennantii	0.597767484	1	0	42	0.592194661	0.106993618
Cricetulus longicaudatus	0.59744783	1	0	24	0.507665195	0.097851012
Murexechinus melanurus	0.597011402	1	0	38	0.563509463	0.086873338
Gerbillus pulvinatus	0.596575977	1	0	36	0.545645571	0.070276887
Otomys lacustris	0.596575914	1	0	35	0.546357422	0.078942244
Proechimys guairae	0.59607623	1	0	50	0.648961325	0.091936846
Otomys tropicalis	0.595945245	1	0	41	0.597323157	0.090574461
Acomys wilsoni	0.595557186	1	0	36	0.553366257	0.086920784
Elephas maximus	0.595432003	1	0	50	0.661461677	0.092454367
Niviventer culturatus	0.595118541	1	0	37	0.550954503	0.073970216
Hyperacrius fertilis	0.594912129	1	0	30	0.523131314	0.107775402
Lissonycteris angolensis	0.594806645	1	0	44	0.597094994	0.087322867
Sylvilagus mansuetus	0.594717599	1	0	28	0.5040644	0.090036665
Dipodillus bottai	0.594641807	1	0	39	0.578660628	0.082231523
Sorex palustris	0.594507688	1	0	33	0.541127252	0.11137905
Peropteryx trinitatis	0.594498331	1	0	45	0.599868254	0.07855452
Mogera imaizumii	0.594174252	1	0	27	0.517861816	0.088272606
Peropteryx macrotis	0.594170832	1	0	42	0.588533134	0.09204228
Lorentzimys nouhuysi	0.59416374	1	0	40	0.584297166	0.095009975
Manis pentadactyla	0.5939871	1	0	31	0.532148741	0.098057899
Hipposideros cyclops	0.59383927	1	0	43	0.585495922	0.085515765
Echymipera rufescens	0.593774222	1	0	37	0.566454571	0.101238559
Pogonomys championi	0.593693117	1	0	36	0.558499533	0.103084996
Ectophylla alba	0.593328252	1	0	46	0.609855717	0.09932165
Artibeus anderseni	0.593117431	1	0	43	0.581159962	0.096470369
Aonyx cinereus	0.592379274	1	0	45	0.644668891	0.113817519
Tamandua tetradactyla	0.5923462	1	0	31	0.5376375	0.086291914
Bauerus dubiaquercus	0.592213928	1	0	41	0.581372663	0.092819251
Rhogeessa aeneus	0.592099578	1	0	43	0.587620384	0.085156889
Pseudochirops archeri	0.591866149	1	0	36	0.549539426	0.079624128
Mazama bororo	0.591844329	1	0	39	0.547216871	0.071814924
Meriones sacramenti	0.591654912	1	0	35	0.550775604	0.092959911
Dipodillus stigmonyx	0.591594382	1	0	40	0.565750285	0.083957782
Ictonyx libycus	0.591149523	1	0	39	0.572025569	0.114478298
Galea flavidens	0.591034647	1	0	43	0.586585415	0.09105741
Marmosops cracens	0.591022466	1	0	40	0.564499154	0.07626428
Molossus pretiosus	0.590710482	1	0	43	0.576661562	0.083125563
Pseudohydromys occidentalis	0.590488642	1	0	26	0.51920077	0.107419812
Rangifer tarandus	0.590409236	1	0	46	0.616747533	0.095603239
Praomys misonnei	0.590398688	1	0	46	0.592421394	0.085219195
Paradoxurus hermaphroditus	0.589586935	1	0	47	0.667707873	0.117449334
Alticola albicaudus	0.58938058	1	0	30	0.519958157	0.088796114
Suncus dayi	0.589378717	1	0	41	0.57047556	0.088054411
Lepus comus	0.58928271	1	0	42	0.593858726	0.094540069
Rhipidomys venezuelae	0.588919575	1	0	47	0.626642733	0.080883697
Pipistrellus minahassae	0.588907774	1	0	37	0.557985487	0.100984681
Makalata didelphoides	0.588796078	1	0	39	0.565441009	0.092150371
Rattus elaphinus	0.588430934	1	0	39	0.56358958	0.07963778
Maxomys ochraceiventer	0.588311053	1	0	47	0.62078168	0.087280787
Zygogeomys trichopus	0.587909283	1	0	25	0.502712736	0.097941143
Beamys hindei	0.587872135	1	0	46	0.62572324	0.09496501
Crocidura orii	0.587488457	1	0	23	0.495375722	0.119828756
Echimys saturnus	0.58746351	1	0	41	0.558324671	0.091330087
Carollia brevicauda	0.587408913	1	0	43	0.588648272	0.094273183
Maxomys dollmani	0.587376023	1	0	40	0.56676014	0.086760233
Homo sapiens	0.587326542	1	0	49	0.617714877	0.050714843
Dremomys rufigenis	0.58715377	1	0	47	0.631459522	0.083670102
Mops sarasinorum	0.587097648	1	0	38	0.559813838	0.091513638
Sylvilagus cunicularius	0.587067858	1	0	42	0.584318742	0.090531998
Neacomys spinosus	0.586866139	1	0	43	0.582602829	0.086275224
Cratogeomys fumosus	0.586807323	1	0	38	0.57514988	0.083811198
Bunomys coelestis	0.586710997	1	0	46	0.579381414	0.068605088
Tonatia saurophila	0.586636384	1	0	43	0.590569733	0.093787501
Scleronycteris ega	0.586483334	1	0	40	0.554693306	0.090880299
Cephalophus natalensis	0.586480685	1	0	46	0.591059528	0.077288963
Arctonyx collaris	0.586239048	1	0	41	0.611459124	0.108977308
Microtus evoronensis	0.586080211	1	0	16	0.451647699	0.087440028
Hipposideros coronatus	0.585843873	1	0	36	0.539748504	0.086389022
Oryzomys couesi	0.585838419	1	0	45	0.606355113	0.090043313
Neotoma phenax	0.585833609	1	0	35	0.564830752	0.090266342
Dephomys defua	0.585713852	1	0	45	0.610787861	0.088560802
Wyulda squamicaudata	0.585434745	1	0	43	0.58798575	0.083505174
Saccolaimus peli	0.585395627	1	0	42	0.565132984	0.086904487
Gerbillus pyramidum	0.585091376	1	0	24	0.509218824	0.107085191
Caluromys derbianus	0.585054864	1	0	41	0.59073191	0.102218931
Rattus osgoodi	0.584603367	1	0	38	0.562849309	0.072086756
Thomasomys vestitus	0.584521713	1	0	45	0.594925019	0.094663965
Hemiechinus collaris	0.584375633	1	0	41	0.5877745	0.089695935
Macruromys elegans	0.584135465	1	0	32	0.534886547	0.092370075
Lepus peguensis	0.583978674	1	0	42	0.588798268	0.088461384
Artibeus lituratus	0.583919327	1	0	39	0.567754428	0.085134292
Microtus breweri	0.583681463	1	0	21	0.505411471	0.101268063
Rhinolophus affinis	0.583591452	1	0	29	0.508096678	0.114618928
Chiropodomys gliroides	0.583136286	1	0	35	0.543776266	0.112213706
Sylvisorex johnstoni	0.583062234	1	0	40	0.580778786	0.085189642
Reithrodontomys paradoxus	0.582650725	1	0	40	0.587533228	0.088756111
Rhinolophus rex	0.582495904	1	0	25	0.489082724	0.082390729
Prosciurillus abstrusus	0.582277598	1	0	45	0.581196769	0.071517601
Myotis ater	0.581390664	1	0	42	0.582093105	0.085182203
Proechimys mincae	0.58062096	1	0	41	0.577459193	0.090330553
Chaetomys subspinosus	0.58057211	1	0	45	0.614757473	0.085079643
Gerbillus nigeriae	0.580361785	1	0	41	0.572386904	0.083715993
Biswamoyopterus biswasi	0.580175642	1	0	42	0.599242183	0.105938363
Mormopterus minutus	0.580092298	1	0	40	0.568933294	0.085707698
Mops congicus	0.579977463	1	0	41	0.584381364	0.086662344
Sphiggurus pruinosus	0.579900841	1	0	43	0.586152135	0.081176158
Mazama chunyi	0.579360646	1	0	42	0.568837096	0.08638204
Lariscus hosei	0.579336132	1	0	42	0.599961966	0.085633688
Alticola roylei	0.578725441	1	0	26	0.516221847	0.085336887
Lophostoma brasiliense	0.578673726	1	0	46	0.598973108	0.095930388
Macroderma gigas	0.578435834	1	0	33	0.525148093	0.093007699
Niviventer tenaster	0.578274755	1	0	47	0.601307484	0.087379432
Myosorex rumpii	0.57798824	1	0	37	0.547218764	0.094158553
Dendrohyrax arboreus	0.577961282	1	0	43	0.572349123	0.064558253
Steatomys cuppedius	0.577846388	1	0	43	0.592386073	0.091126274
Nanonycteris veldkampii	0.57782255	1	0	41	0.5886694	0.086212602
Ochotona muliensis	0.577593322	1	0	27	0.519720227	0.075254747
Sciurotamias forresti	0.577585758	1	0	44	0.574251893	0.074311407
Mus saxicola	0.577389046	1	0	34	0.546930078	0.091497133
Nyctimene cyclotis	0.577378693	1	0	32	0.528332932	0.087306444
Petaurillus hosei	0.57727185	1	0	43	0.606017191	0.090177587
Sorex alpinus	0.577108861	1	0	29	0.527024283	0.102092665
Rhinolophus osgoodi	0.57676022	1	0	23	0.481051294	0.105538673
Mallomys istapantap	0.576612207	1	0	44	0.600868036	0.086397682
Callorhinus ursinus	0.576457932	1	0	18	0.4577163	0.103826729
Sphaeronycteris toxophyllum	0.576330856	1	0	39	0.569811041	0.092110699
Neacomys tenuipes	0.576226442	1	0	48	0.62220603	0.094839886
Habromys lophurus	0.575859924	1	0	39	0.569812787	0.080684578
Microtus arvalis	0.575754813	1	0	35	0.532481728	0.101118514
Chiruromys forbesi	0.575453228	1	0	41	0.578544947	0.088425576
Paramelomys rubex	0.575401834	1	0	38	0.581431446	0.10538195
Sylvisorex isabellae	0.57540109	1	0	37	0.551346685	0.089075726
Necromys urichi	0.575311759	1	0	43	0.589888457	0.099446172
Mimon cozumelae	0.575110922	1	0	41	0.584925646	0.08261095
Microsciurus flaviventer	0.575089539	1	0	33	0.53966375	0.092076354
Artibeus glaucus	0.574991181	1	0	44	0.583733474	0.090318737
Apodemus gurkha	0.574906843	1	0	38	0.550404095	0.084809199
Marmosa rubra	0.574789821	1	0	41	0.56967392	0.087356883
Chaerephon jobensis	0.574741478	1	0	16	0.455711882	0.101292866
Crocidura nigeriae	0.574611896	1	0	38	0.576975542	0.100766499
Gerbillus principulus	0.574568765	1	0	21	0.470087575	0.074280596
Alionycteris paucidentata	0.574480725	1	0	36	0.5489936	0.09252909
Petaurista philippensis	0.574420047	1	0	46	0.641258443	0.106610435
Millardia meltada	0.574370196	1	0	38	0.580921502	0.105936837
Ochotona thibetana	0.57416887	1	0	25	0.498551077	0.082554225
Proechimys quadruplicatus	0.573979961	1	0	39	0.564247129	0.09792228
Mesophylla macconnelli	0.573804543	1	0	40	0.589665998	0.098698796
Moschus fuscus	0.573783171	1	0	48	0.616157392	0.087890231
Myonycteris relicta	0.573760316	1	0	45	0.598488414	0.080907742
Elephantulus fuscipes	0.573393404	1	0	40	0.560230169	0.077701733
Callicebus oenanthe	0.573367766	1	0	39	0.561480747	0.088527913
Felis silvestris	0.573239159	1	0	26	0.504781334	0.112931085
Felis manul	0.57288836	1	0	35	0.538221629	0.092771273
Suncus fellowesgordoni	0.572823041	1	0	36	0.569422614	0.108053934
Neodon irene	0.572628277	1	0	21	0.489077658	0.074203365
Proechimys goeldii	0.57234762	1	0	38	0.565879427	0.098089917
Malacomys cansdalei	0.571602424	1	0	45	0.618952831	0.088192453
Microtus umbrosus	0.571524476	1	0	29	0.505294944	0.094041652
Oreamnos americanus	0.57149283	1	0	39	0.557473896	0.087856372
Natalus primus	0.571366284	1	0	33	0.538426066	0.090710556
Planigale novaeguineae	0.571192177	1	0	35	0.54408547	0.096219986
Sorex bedfordiae	0.571105895	1	0	26	0.503896968	0.103822156
Glyphonycteris daviesi	0.570711681	1	0	42	0.5852699	0.091789531
Aeretes melanopterus	0.570707969	1	0	37	0.5661975	0.079994135
Sciurus gilvigularis	0.570477409	1	0	43	0.586391903	0.09879133
Gerbillus cheesmani	0.569913668	1	0	33	0.523911873	0.083820411
Macruromys major	0.569428807	1	0	42	0.583251109	0.088641426
Monodelphis maraxina	0.569355145	1	0	43	0.598861339	0.098374426
Kerivoula flora	0.568873146	1	0	37	0.573677345	0.095658079
Uroderma magnirostrum	0.568718429	1	0	44	0.589437932	0.095697531
Gerbillus poecilops	0.568629888	1	0	36	0.561201626	0.086883197
Lemmus sibiricus	0.568557208	1	0	16	0.468095705	0.107699491
Vulpes lagopus	0.568505372	1	0	39	0.587940206	0.116418918
Dremomys everetti	0.568455762	1	0	47	0.629498072	0.079091731
Niviventer coninga	0.568204184	1	0	36	0.541790182	0.077092537
Echymipera echinista	0.567971971	1	0	35	0.555436889	0.096852229
Nyctomys sumichrasti	0.567890824	1	0	46	0.609277659	0.100445585
Callithrix penicillata	0.567801286	1	0	43	0.584963731	0.086101168
Saccopteryx leptura	0.567762219	1	0	39	0.563852892	0.088196198
Leptonycteris curasoae	0.567732468	1	0	40	0.585201936	0.090440291
Oxymycterus angularis	0.567523859	1	0	37	0.546722617	0.072704342
Cryptotis gracilis	0.56740027	1	0	44	0.584773726	0.086111478
Proechimys cuvieri	0.567323225	1	0	36	0.559032783	0.102772325
Sylvilagus palustris	0.567234908	1	0	40	0.583891211	0.096877892
Mormopterus doriae	0.567075994	1	0	39	0.564251598	0.087873469
Zyzomys maini	0.567062586	1	0	22	0.489479327	0.100415589
Lemniscomys bellieri	0.566825503	1	0	39	0.571975164	0.079045824
Praomys rostratus	0.566818189	1	0	45	0.614559038	0.092471299
Berylmys bowersi	0.566432055	1	0	41	0.578987678	0.0990552
Myonycteris torquata	0.5663744	1	0	43	0.581339646	0.086212667
Ochotona curzoniae	0.56636522	1	0	21	0.496278677	0.095110977
Oecomys rutilus	0.566356914	1	0	30	0.538245916	0.103458823
Genetta victoriae	0.566293076	1	0	45	0.598772449	0.087402163
Hipposideros speoris	0.566280504	1	0	38	0.567361594	0.085089982
Euroscaptor klossi	0.566117317	1	0	37	0.559430716	0.08423111
Choeroniscus godmani	0.565805694	1	0	42	0.592892751	0.095056013
Poelagus marjorita	0.565758932	1	0	44	0.593616523	0.096823508
Conilurus penicillatus	0.565529276	1	0	27	0.523128807	0.103878239
Otopteropus cartilagonodus	0.565226217	1	0	39	0.566677704	0.089766129
Rhinophylla fischerae	0.565194069	1	0	37	0.563893213	0.096353788
Pedetes surdaster	0.565088363	1	0	46	0.594046975	0.077380801
Uropsilus investigator	0.565038506	1	0	30	0.494490827	0.093152225
Mimon crenulatum	0.564586729	1	0	46	0.591944932	0.08561485
Mops trevori	0.564441736	1	0	35	0.555058627	0.092275488
Mammelomys lanosus	0.564353968	1	0	32	0.552564283	0.110177391
Oecomys rex	0.563503849	1	0	31	0.536723153	0.103693195
Genetta servalina	0.563431177	1	0	47	0.598906287	0.082229219
Gerbillus aquilus	0.563135315	1	0	34	0.521612787	0.088218512
Diaemus youngi	0.562754083	1	0	36	0.545326485	0.089880737
Micronycteris hirsuta	0.562732735	1	0	45	0.589351485	0.095428737
Choeroniscus minor	0.562637442	1	0	39	0.573178761	0.098185902
Emballonura semicaudata	0.562256838	1	0	39	0.552258029	0.084052687
Haeromys pusillus	0.562235497	1	0	39	0.587826615	0.091371285
Monophyllus redmani	0.562185615	1	0	43	0.591243678	0.088043264
Herpestes ichneumon	0.562158953	1	0	42	0.587030491	0.091231732
Atilax paludinosus	0.562113792	1	0	44	0.612789999	0.09754804
Macrotarsomys ingens	0.561916887	1	0	38	0.56206903	0.082839781
Artibeus obscurus	0.56179766	1	0	37	0.55474675	0.085398043
Mallomys rothschildi	0.561649142	1	0	43	0.600310024	0.08157307
Macropus irma	0.561553027	1	0	23	0.474670044	0.087677577
Tadarida kuboriensis	0.561408903	1	0	33	0.540702489	0.0800365
[truncated: 3,401 more rows]
